# Phylofactorization: a graph-partitioning algorithm to identify phylogenetic scales of ecological data

December 15, 2017

Alex D. Washburne<sup>1</sup>, Justin D. Silverman<sup>2,3</sup>, James T. Morton<sup>4,5</sup>, Daniel J.  
Becker<sup>1</sup>, Daniel Crowley<sup>1</sup>, Sayan Mukherjee<sup>3,6</sup>, Lawrence A. David<sup>3</sup>, Raina K.  
Plowright<sup>1</sup>

**Affiliations:** <sup>1</sup>Department of Microbiology and Immunology, Montana State  
University, Bozeman MT, 59717, USA

<sup>2</sup>Program for Computational Biology and Bioinformatics, Duke University,  
Durham NC, 27708, USA

<sup>3</sup>Center for Genomic and Computational Biology, Duke University, Durham  
NC, 27708, USA

<sup>4</sup>Department of Computer Science, University of California San Diego, La  
Jolla CA, 92037, USA

<sup>5</sup>Department of Pediatrics, University of California San Diego, La Jolla CA,  
92037, USA

<sup>6</sup>Department of Statistical Science, Mathematics, and Computer Science,  
Duke University, Durham NC, 27708 USA

# Abstract

The problem of pattern and scale is a central challenge in ecology [27]. The problem of scale is central to community ecology, where functional ecological groups are aggregated and treated as a unit underlying an ecological pattern, such as aggregation of “nitrogen fixing trees” into a total abundance of a trait underlying ecosystem physiology. With the emergence of massive community ecological datasets, from microbiomes to breeding bird surveys, there is a need to objectively identify the scales of organization pertaining to well-defined patterns in community ecological data.

The phylogeny is a scaffold for identifying key phylogenetic scales associated with macroscopic patterns. Phylofactorization was developed to objectively identify phylogenetic scales underlying patterns in relative abundance data. However, many ecological data, such as presence-absences and counts, are not relative abundances, yet the logic of defining phylogenetic scales underlying a pattern of interest is still applicable. Here, we generalize phylofactorization beyond relative abundances to a graph-partitioning algorithm for traits and community-ecological data from any exponential-family distribution.

Generalizing phylofactorization yields many tools for analyzing community ecological data. In the context of generalized phylofactorization, we identify three phylogenetic factors of mammalian body mass which arose during the K-Pg extinction event, consistent with other analyses of mammalian body mass evolution. We introduce a phylogenetic analysis of variance which refines our understanding of the major sources of variation in the human gut. We employ generalized additive modeling of microbes in central park soils to confirm that a large clade of Acidobacteria thrive in neutral soils. We demonstrate how to extend phylofactorization to generalized linear and additive modeling of any dataset of exponential family random variables. We finish with a discussion

of how phylofactorization produces a novel species concept, a hybrid of a phylogenetic and ecological species concepts in which the phylogenetic scales and units of interest are defined objectively by defining the ecological pattern and partitioning the phylogeny into clades based on different contributions to the pattern. All of these tools can be implemented with a new R package available online.

## Keywords

Phylofactorization, phylogeny, microbiome, ecological data, big data, graph partitioning, dimensionality reduction

## Introduction

The problem of pattern and scale is a central problem in ecology [27]. Ecosystem physiology, species abundance distributions, epidemics, ecosystem services of animal-associated microbial communities and more ecological patterns of interest are often the result of processes operating at multiple scales. Traditionally, the “scales” of interest are space, time, and levels of ecological organization ranging from individuals to populations to ecosystems. Prediction of spatial variation over millimeters, meters, or kilometers changes the processes driving patterns observed. Predicting climatic and weather patterns over days, years, or millennia requires different data, processes and models. Predicting the collective behavior of a school of fish requires interfacing individual behavior with interaction networks of those individuals [25] whereas predicting the ability of a forest to act as a carbon sink requires interfacing weather, nutrient cycles,

70 and competition between trees with different traits, such as nitrogen fixation  
71 [11]. Understanding emergent infectious diseases requires interfacing processes  
72 over scales ranging from animal population dynamics, reservoir epizootiology,  
73 and human epidemiology [37]. Ecological theory requires interfacing phenom-  
74 ena across scales believed to be important, and continually updating our beliefs  
75 about which scales are important to interface.

76 For a novel or unfamiliar pattern, such as a change in microbial community  
77 composition along environmental gradients, how can one objectively identify  
78 the appropriate scales of ecological organization? In macroscopic systems, a  
79 researcher will use intuition derived from natural history knowledge to determine  
80 scales of interest. Models of how the presumably important natural history traits  
81 affect the pattern will be constructed, and the goodness of fit to the pattern of  
82 interest will be used as a metric for the successful identification of ecological  
83 scales/traits. However, for some patterns, such as the ecosystem physiology of  
84 the human microbiome, there is limited natural history knowledge to draw on to  
85 assist the decision of the appropriate scales of interest. There is a need for rules,  
86 algorithms and laws for the simplification, aggregation, and scaling of ecological  
87 phenomena.

88 A central feature of biological systems is the existence of a hierarchical as-  
89 semblage of entities, from genes to species, whose relationships and evolutionary  
90 history can be estimated and organized into a hierarchical tree. The estimated  
91 phylogeny contains edges along which mutations occur and new traits arise.  
92 When the phylogeny correctly captures the evolution of discrete, functional eco-  
93 logical traits underlying a pattern of interest, the phylogeny is a natural scaffold  
94 for simplification, aggregation, and scaling in ecological systems. Patterns such  
95 as the change of bacterial abundances following antibiotic exposure, whose func-  
96 tional ecological traits of antibiotic resistance are laterally transferred, can still

107 be simplified by constructing a phylogeny of the laterally transferred genes, such  
108 as the beta-lactamases[18], as a natural scaffold for defining the entities with  
109 different responses to antibiotics.

110 The phylogeny contains a hierarchy of possible scales for aggregation. Gra-  
111 ham et al. [17] develop the term “phylogenetic scale” to refer to the depth of the  
112 tree over which we aggregate information from a clade. Functional ecological  
113 traits often arise at different depths of the tree. Many ecological phenomena may  
114 be driven by traits not properly summarized or aggregated by “hedge-row” trim-  
115 ming of the phylogeny along a constant depth, but by identification of multiple  
116 phylogenetic scales, or grains, underlying an ecological pattern of interest. For  
117 example, the patterns of vertebrate abundances on land and water are simpli-  
118 fied by nested clades: tetrapods, cetaceans, Pinnipeds, etc. Identifying multiple  
119 phylogenetic scales associated with or driving an ecological pattern of interest  
120 requires general methods for partitioning the phylogeny into the grains with  
121 significantly different associations or contributions to the ecological pattern.

122 Phylofactorization [51] was developed to identify the phylogenetic scales in  
123 relative abundance (i.e. compositional) data by iteratively partitioning the phy-  
124 logeny and constructing variables corresponding to edges in the phylogeny and  
125 selecting variables which maximize an objective function. Phylofactorization  
126 of compositional data exploits a common transform from compositional data  
127 analysis [1], referred to as the isometric log-ratio transform [10, 9], which pro-  
128 vides a natural way to turn the phylogeny into a set of variables capable of  
129 identifying differences between clades. A coordinate in an isometric log-ratio  
130 transform aggregates relative abundances within clades by a geometric mean  
131 and contrasts clades through log-ratios of the clades’ geometric mean relative  
132 abundances. The isometric log-ratio transform is used to identify phylogenetic  
133 scales capturing large blocks of variation in relative-abundance data, with vari-

ables that correspond to edges along which hypothesized functional ecological traits arose.

However, many ecological data are more appropriately viewed as counts, not compositions. In this paper, we generalize phylofactorization to broader classes of data types by generalizing the logic of phylofactorization and the general problem of scale in ecology to a set of three operations: aggregation, contrast, and an objective function defined by the pattern of interest. With these operations, phylofactorization can be defined as a graph-partitioning algorithm which avoids the nested dependence of hierarchies of clades and controls for previously identified phylogenetic scales. Generalizing the operations of aggregation and contrast in a phylogenetic graph-partitioning algorithm provides an explicit, theoretical framework defining place-holders for specific operations used a research endeavor. Furthermore, as points on the surface of a sphere are easily represented in spherical coordinates, ecological data at the tips of a phylogeny are easily represented with a change of variables made possible by aggregation and contrast, a set of variables we call the “contrast basis”. Phylofactorization is a versatile tool for identifying the phylogenetic scales underlying ecological patterns of interest across a range of patterns and data types.

After defining phylofactorization as a graph-partitioning algorithm, we illustrate the generality of the algorithm through several examples. First, we show that two-sample tests, such as t-tests and Fisher’s exact test, are natural operations for phylofactorization - they first aggregate data from two groups through means, contrast the aggregates via a difference of means, and have natural objective functions defined by their test-statistics. We illustrate the use of two-sample tests by performing phylofactorization of a dataset of mammalian body mass.

Then, we show how the phylogeny serves as a scaffold for changing variables

in biological data through a contrast basis which can be used to identify the phylogenetic scales providing low-rank, phylogenetically-interpretable representations of a dataset. Defining the contrast basis allows us to introduce a phylogenetic analog of principal components analysis - phylogenetic components analysis - which identifies edges and dominant, phylogenetic scales differentiating species and explaining variance in a dataset. We perform phylogenetic components analysis on the American Gut microbiome dataset ([www.americangut.org](http://www.americangut.org)) and reveal that some of the dominant clades explaining variation in the American Gut correspond to clades within Bacteroides and Firmicutes, thereby providing finer, phylogenetic resolution of a known, major axis of variation in human gut microbiomes found to be associated with obesity [47], age [31] and more. Another phylogenetic factor of variance in the American Gut is a clade of Gammaproteobacteria strongly associated with IBD, corroborating a recent study's use of phylofactorization to diagnose patients with IBD [49]. The contrast basis can also be used with regression if the data assumed to be approximately normal, log-normal, logistic-normal or otherwise related to the normal distribution through a monotonic transformation. We illustrate regression-phylofactorization through a generalized additive model analysis of how microbial abundances change across a range of pH, Nitrogen, and Carbon concentrations in soils. The resulting contrast basis and its fitted values from generalized additive modeling yield a low-rank representation of biological big-data and translates to clear biological hypotheses aiming to identify the traits driving observed non-linear patterns of abundance across pH [39].

Datasets comprised of non-Gaussian, exponential family random variables can still be analyzed through regression-phylofactorization by using the generalized algorithm and implementing factor-contrasts in a multivariate generalized linear model as the contrast operation. We present, and demonstrate the power

of, three methods for generalized regression-phylofactorization in exponential family data. The first method is to use the contrast basis to obtain a low-rank approximation of coefficient matrices in multivariate generalized linear models. The second is a reduced rank regression model in which a phylogenetic factor, an explanatory variable indicating which side of an edge a species is found, is incorporated into regression and used to define objective functions based on the deviance or the magnitude of the coefficients for the factor-contrast. The third method aggregates exponential family data within clades to marginally stable distributions within the exponential family, and then performs a two-variable multivariate regression with a factor contrast as used in the second method. We simulate the asymptotic power of the last two methods, demonstrating that marginally-stable aggregation and factor-contrasts are a viable method for phylofactorization through generalized linear and additive models. We finish with a discussion of the challenges, and opportunities, for future development of phylofactorization, and provide an R package - phylofactor - available at <https://github.com/reptalex/phylofactor>.

## Phylofactorization

Which vertebrates live on land, and which vertebrates live in the sea (Figure 1a)? Most children have enough natural history knowledge to say “fish live in the sea”, thus correctly identifying one of the most important phylogenetic factors of land/sea associations in vertebrates. The statement “fish live in the sea” can be mathematically captured by noting that one edge in the vertebrate phylogeny separates “fish” from “non-fish” (Figure 1b). Partitioning the phylogeny along the edge basal to tetrapods can separate our species fairly well by land/sea associations. An algorithm for identifying that edge by land/sea associations alone,



203 without requiring detailed knowledge of macroscopic life and morphological and  
 204 physiological traits, can correctly identify an edge along which functional ecolog-  
 205 ical traits and life-history traits arose. Controlling for the previously identified  
 206 edge, one might be able to identify the edges basal to Cetaceans and Pinnipeds,  
 207 tetrapods which live in the sea (Figure 1b). Three edges can capture most of  
 208 the variation in land/sea associations across potentially thousands of vertebrate  
 209 species.

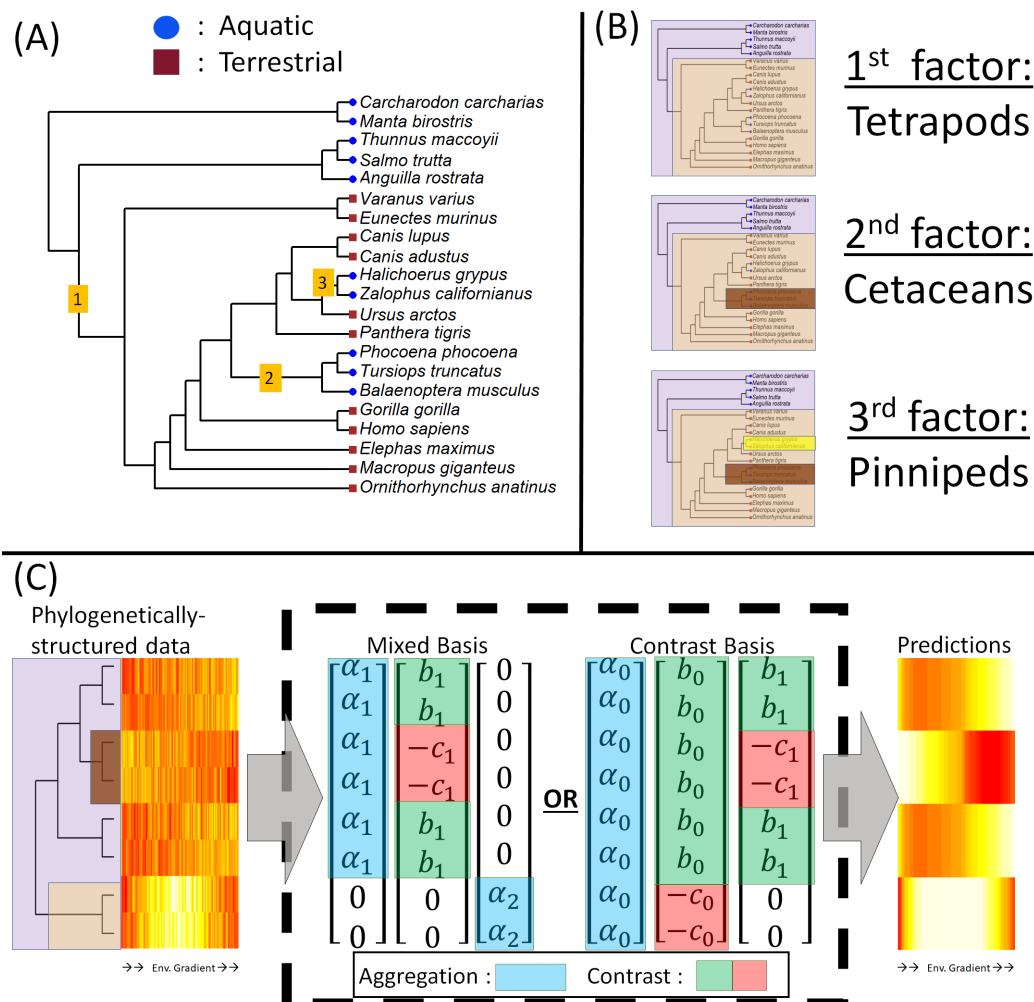

Figure 1: Phylofactorization aims to generalize the logic of how to simplify phylogenetically-structured datasets. (A) A dataset of vertebrate land/water associations can be simplified by partitioning the tree into the edges along which major traits arose. (B) The first phylogenetic factor of vertebrate land/water associations is the edge along which tetrapods arose - an edge along which lungs and limbs evolved that allowed colonization of land. Downstream factors can refine the original partitioning, and include the Cetaceans and Pinnipeds, among other edges along which adaptation to aquatic life arose among tetrapods. (C) Phylogenetic factorization generalizes this same logic for phylogenetically-structured data in which traits might not be known or their evolution easily modeled, including traits like a non-linear relationship between abundance and an environmental gradient. Phylogenetically-structured data can be partitioned through operations of aggregation and contrast. Pure aggregations (blue) are total abundances of a clade, whereas contrast (green/red) are statements of differences between two clades. Low-rank, phylogenetically-interpretable predictions of our data can be obtained through a mixed basis of a series of aggregations and contrasts, or a “contrast basis” in which there is a global aggregate partitioned in subsequent contrasts.

210 Ancestral state reconstruction of habitat association provides a well-known  
 211 means of making such inferences. However, sometimes the desired “traits” and  
 212 ecological patterns of interest are more complicated and their ancestral state re-  
 213 construction dubious. For instance, how can we identify the phylogenetic scales  
 214 of changes in microbial community composition along a pH gradient, allow-  
 215 ing possible non-linear associations that could be detected through generalized  
 216 additive modeling? Answering such a question through ancestral state recon-  
 217 struction requires conceiving and analyzing an evolutionary model of how the  
 218 generalized additive models of pH association evolve along a tree. Phylofactor-  
 219 ization aims to generalize the phylogenetic logic used for land/sea associations  
 220 in order to identify phylogenetic scales for more complicated functional traits  
 221 and ecological patterns, for which an evolutionary model would be dubious.  
 222 Phylogenetic factorization generalizes the logic of land/sea associations through  
 223 a graph partitioning algorithm iteratively identifying edges in the phylogeny  
 224 along which meaningful differences arise (Figure 1c).

## 225 General Algorithm

226 Phylofactorization requires a set of phylogenies, rooted or unrooted graphs with  
 227 no cycles, containing and connecting the units of interest in our data (the “units”  
 228 can be species, genes or operons other evolving units of interest). Phylofactor-  
 229 ization can be done using disjoint sub-graphs, such as viral phylogenies for  
 230 which there are not clear common ancestors, and the sub-phylogenies can either  
 231 be kept separate or joined at a polytomous root. The phylogeny may have an  
 232 arbitrary number and degree of polytomies, and can even be a star graph.

233 Let  $[x]_{i,j}$  be the data for species  $i = 1, \dots, m$  in sample  $j = 1, \dots, n$ . Let  
 234  $\mathbf{x}_{R,j}$  be the vector of a subset of species,  $R$ , in sample  $j$ . Let  $\mathbf{Z}$  be the  $n \times p$   
 235 matrix containing  $p$  additional meta-data variables for each sample. Let  $\mathcal{T}$  be

the phylogenetic tree and let edge  $e$  partition the phylogeny into disjoint groups  $R$  and  $S$ . Phylofactorization requires:

- An aggregation function,  $A(\mathbf{x}_{R,j}, \mathcal{T})$  which aggregates any subset,  $R$ , of species
- A contrast function,  $C(A(\mathbf{x}_{R,j}, \mathcal{T}), A(\mathbf{x}_{S,j}, \mathcal{T}), \mathcal{T}, e)$  which contrasts the aggregates of two disjoint subsets of species,  $R$  and  $S$ , possibly using information from the tree  $\mathcal{T}$  and edge,  $e$ .
- An objective function,  $\omega(C, \mathbf{Z})$ .

With these operations, phylofactorization is defined iteratively as a special case of a graph partitioning algorithm (Figure 2). The steps of phylofactorization are:

1. For each edge,  $e$ , separating disjoint groups of species  $R_e$  and  $S_e$  within the sub-tree containing  $e$ , compute  $C_e = C(A(\mathbf{x}_{R_e,j}, \mathcal{T}), A(\mathbf{x}_{S_e,j}, \mathcal{T}), \mathcal{T}, e)$
2. compute edge objective  $\omega_e = \omega(C_e, \mathbf{Z})$  for each edge,  $e$
3. Select winning edge  $e^* = \underset{e}{\operatorname{argmax}}(\omega_e)$
4. Partition the sub-tree containing  $e^*$  along  $e^*$ , forming two disjoint sub-trees.
5. Repeat 1-5 until a stopping criterion is met.

Unlike more general graph-partitioning algorithms, phylofactorization does not impose a balance constraint - it does not require that the partitions have a similar size or weight. Furthermore, phylofactorization, by working with phylogenies or graphs without cycles is centered around aggregation and contrast as principle operations for defining scales and units of organization. Phylofactorization is limited to contrasts of non-overlapping groups. The incorporation of the tree,

260  $\mathcal{T}$ , in the contrast function encompasses a class of ancestral state reconstruction  
 261 reconstruction methods. Ancestral state reconstruction with non-overlapping  
 262 contrasts can be done with time-reversible models of evolution; in this case,  
 263 phylofactorization contrasts the root ancestral states obtained in which the two  
 264 nodes adjacent an edge are considered roots of the subtrees separated by an  
 265 edge.

266 The edges,  $e^*$  and their contrasts,  $C_e$ , are interchangeably referred to as  
 267 the “phylogenetic factors” due to their correspondence to hypothesized latent  
 268 variables (traits) and their ability to construct basis elements that allow ma-  
 269 trix factorization [51]. It’s possible to define objective functions through pure  
 270 aggregation, but we limit our focus to contrast-based phylofactorizations which  
 271 identify edges along which meaningful differences arose for reasons discussed  
 272 later in the section on the “contrast basis”.

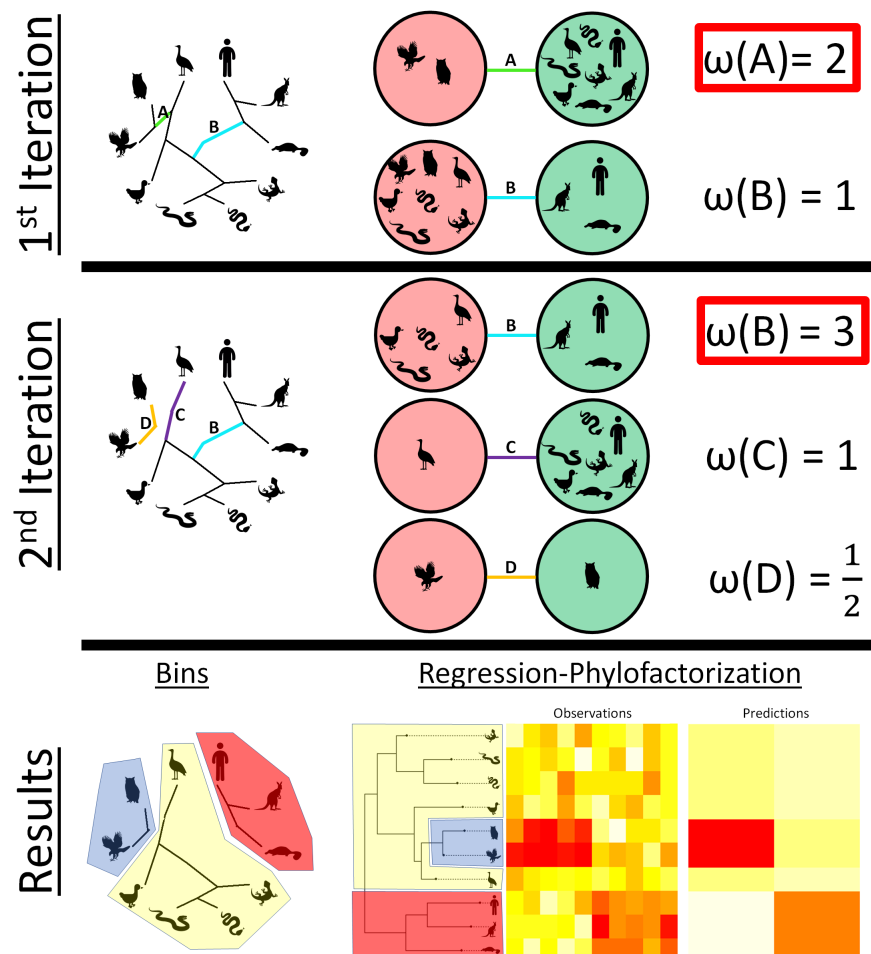

Figure 2: Phylofactorization is a graph partitioning algorithm. Defining an objective function,  $\omega$ , of a contrast of species separated by an edge allows one to iteratively partition the phylogeny along edges maximizing the objective function (1st iteration). After partitioning the phylogeny, the objective functions are re-computed to contrast species in the same sub-tree separated by an edge. Edge B in the first iteration contrasted mammals from non-mammals, but in the second iteration it contrasts mammals from non-mammals, excluding raptors (partitioned in the first iteration). The result of  $k$  iterations of phylofactorization is a set of  $k + 1$  bins of species with similar within-group behavior. A particularly useful case is “regression-phylofactorization”. Regression-phylofactorization is implemented by defining contrasts through the contrast basis (Figure 1c) and defining an objective function through regression on the component scores of each candidate contrast basis element. Regression-phylofactorization is a flexible way to search for clades with similar patterns of association with environmental meta-data while also obtaining low-rank, phylogenetically-interpretable representations of a data matrix.

273 The result of phylofactorization after  $t$  iterations is a set of  $t$  inferences on  
 274 edges or links of edges. Links of edges occur following a previous partition,  
 275 when two adjoining edges separate the same two groups in the resultant sub-  
 276 tree. Partitioning the phylogeny along  $t$  edges results in  $t + 1$  bins of species,  
 277 referred to as “binned phylogenetic units”. In general, the problem of maximizing  
 278 some global objective function,  $\omega(e_1^*, \dots, e_t^*)$ , for a set of  $t$  edges,  $\{e_1^*, \dots, e_t^*\}$ , is  
 279 NP hard [6]. However, stochastic searches of the space of possible partitions,  
 280 via a stochastic computation of  $\omega_e$  in step 2 or a weighted draw of  $e^*$  in step 3,  
 281 may better maximize a global objective function for general graph-partitioning  
 282 algorithms such as phylofactorization [32, 20, 23].

283 Generalizing aggregation, contrast, and objective functions allows researchers  
 284 several junctures to define and interpret meaningful quantities and outcomes  
 285 from data analysis. Explicit decisions about aggregation formalize how a re-  
 286 searcher would summarize data from an arbitrary set of species. Explicit de-  
 287 cisions about contrast formalize how a researcher differentiates two arbitrary,  
 288 disjoint groups of species - these common operations form an organizational  
 289 framework for ecologists studying phylogenetic scales. Aggregation can be done  
 290 through many operations, including but not limited to addition, multiplication,  
 291 generalized means, and maximum likelihood estimation of ancestral states un-  
 292 der models of trait diffusion away from the focal node. Likewise, examples of  
 293 contrasts are differences, ratios, various two-sample tests, and more complicated  
 294 metrics of dissimilarity such as the deviance of a factor contrast in a generalized  
 295 additive model. Researchers must decide for themselves how best to aggregate  
 296 information in groups of species, contrast two groups, and decide which group  
 297 maximizes the objective for a research goal pertaining to a particular ecolog-  
 298 ical pattern. Doing so allows objective, a priori definitions of what makes an  
 299 informative phylogenetic scale, and the operations chosen are integrated into a

broader theoretical framework of phylofactorization.

Below, we run through several examples aimed to develop the generality and illustrate the results from phylofactorization. These examples were run using the R package “phylofactor”, using relevant functions for analyzing and visualizing phylogenies from the R packages *ape* [36], *phangorn* [43], *phytools* [40], and *ggtree* [52]. Scripts and datasets for every analysis are available in the supplemental materials.

## Example 1: two-sample tests and mammalian body-mass phylofactorization

If the data are a single vector of observations,  $\mathbf{x}$ , similar to the land/sea associations of vertebrates, phylofactorization can be implemented through standardized tests for differences of means or rate parameters in the two sets of species,  $R$  and  $S$ . Two-sample tests may bias away from the tips and towards the interior edges of the phylogeny due to increased power of two-sample tests of more equally-sized samples.

For example, a dataset of mammalian body mass from PanTHERIA [24] and the open tree of life using the R package “rotl” [33]. A single vector of data assumed to be log-normal can be factored based on a two-sample t-test (Figure 3a). In this case,  $A(\mathbf{x}_R) = \overline{\log(\mathbf{x}_R)}$  is the arithmetic mean of the log-body-mass; we use the contrast operation

$$C = \frac{|A(\mathbf{x}_R) - A(\mathbf{x}_S)|}{\sqrt{\frac{1}{r} + \frac{1}{s}}} \quad (1)$$

and the objective function  $\omega_e = C_e$  - this is the two-sample t-test with the assumption of constant variance. Maximization of the objective function yields edges with the most significant difference in body mass of organisms on different



sizes of the tree.

The first five phylogenetic factors of mammalian body mass in these data are Euungulata, Ferae, Laurasiatheria (excluding Euungulata and Ferae), a clade of rodent sub-orders Myodonta, Anomaluromorpha, and Castorimorpha, and the simian parvorder Catarrhini. Five factors produce six binned phylogenetic units of species with different average body mass (Figure 3a). The most significant phylogenetic partition of mammalian body mass occurs along the edge basal to Euungulata, containing 296 species with significantly larger body mass than other mammals. The second partition corresponds to Ferae, containing 242 species which have body masses larger than other mammals, excluding Euungulata. The third partition corresponds to 864 remaining species in Laurasiatheria, excluding Euungulata and Ferae, which contains Chiroptera, Erinaceomorpha, and Soricomorpha. These mammals have lower body mass than non-Laurasiatherian mammals. The fourth partition identifies three rodent sub-orders comprising 926 species with lower body mass than non-Laurasiatherian mammals. Finally, 106 species comprising the Simian parvorder Catarrhini are factored as having higher body mass than the remaining mammals. These factors are fairly robust: 3000 replicates of stochastic Metropolis-Hasting phylofactorization, drawing edges in proportion to  $C^\lambda$  with  $\lambda = 6$  (producing a 1/4 probability of drawing the most dominant edge) could not improve upon these 5 factors.

The first two phylogenetic factors of mammalian body size partition the mammalian tree at deep edges with ancestors near the K-Pg extinction event, corroborating evidence of ecological release [2, 3] and the exponential growth of maximum body sizes following the K-Pg extinction event [46] for these two dominant clades. The crown group of modern Euungulata are thought to have originated in the late Cretaceous [53] and its representatives may have expanded

into previously dinosaur-occupied niches during the rapid evolution of body size in mammals immediately after the K-Pg extinction event at the Cretaceous/Paleogene boundary [45]. Cope's rule posits that lineages tend to increase in body size over time, and a recent study [4] confirms Cope's rule and found that mammals have, along all branch lengths in their phylogeny, tended to increase in size. The phylogenetic factors of mammalian body size discovered here illustrate an important feature of phylofactorization: correlated evolution within a clade, such as a consistently high body-size increase among lineages in a clade, can cause the edge basal to a clade to be an important partition for capturing variance in a trait. A more robust phylofactorization may be done through iterative ancestral-state reconstruction of the roots of subtrees partitioned by each edge (where the subtrees are re-rooted at the nodes adjacent the edge), but this unsupervised phylogenetic factorization body masses in 3374 mammals takes 15 seconds on a laptops and yields partitions which simplify the story of mammalian body-mass variation to a set of 5 edges forming 6 binned phylogenetic units.

Two-sample tests can be used for phylogenetic factorization of any vector of trait data. For another example, Bernoulli trait data, such as presence/absence of a trait, can be factored using Fisher's exact test that there is the same proportion of presences in two groups,  $R$  and  $S$ . In this case, the aggregation operation  $A(\mathbf{x}_R) = \sum_{i \in R} x_i$  counts the number of successes in group  $R$ , the contrast operation is the computation of the P-value using Fisher's exact test and the contingency table

| Successes                           | Failures                                      | Total   |
|-------------------------------------|-----------------------------------------------|---------|
| $A(\mathbf{x}_R)$                   | $r - A(\mathbf{x}_r)$                         | $r$     |
| $A(\mathbf{x}_S)$                   | $s - A(\mathbf{x}_S)$                         | $s$     |
| $A(\mathbf{x}_R) + A(\mathbf{x}_S)$ | $r + s - (A(\mathbf{x}_r) + A(\mathbf{x}_S))$ | $r + s$ |

and an objective function can be defined as the inverse of the P-value from

374 Fisher’s exact test,  $\omega_e = |C_e^{-1}|$ . The phylofactorization of vertebrates by  
 375 land/water association in Figure 1, using an ad-hoc selection of vertebrates for  
 376 illustration, was performed using Fisher’s exact test, and the factors obtained  
 377 correspond to Tetrapods, Cetaceans, and Pinnipeds. Unlike the phylofactoriza-  
 378 tion of mammalian body mass, all three factors obtained from phylofactorization  
 379 of vertebrate land/water association correspond to a set of traits. Tetrapods  
 380 evolved lungs and limbs which allowed them to live on land. Cetaceans evolved  
 381 fins and blowholes, and Pinnipeds evolved fins, all traits adaptive to life in the  
 382 water.

383 Two-sample tests are used when partitioning a vector of traits. Phylofac-  
 384 torization of body mass and land/water associations illustrate two potential  
 385 evolutionary models under which edges are important: correlated evolution of  
 386 members of a clade and punctuated equilibria. More complicated methods for  
 387 phylofactorization can keep these cases in mind when interpreting the edges  
 388 identified: they may correspond to traits, or they may correspond to ancient  
 389 (and possibly ongoing) evolutionary processes common within a clade, such  
 390 as ecological release or niche partitioning. When the objective function from  
 391 two-sample tests has a well-defined null distribution, the uniformity of the dis-  
 392 tribution of P-values from two-sample tests can be used to define a stopping criteria  
 393 as discussed later (see: “stopping criteria”).

## 394 **Example 2: Contrast basis and phylogenetic components** 395 **analysis**

396 For datasets with multiple samples of the same feature, such as abundance data  
 397 for a set of species across a range of habitats, the phylogeny provides a natu-  
 398 ral scaffold for low-rank, phylogenetically interpretable approximations of the  
 399 data. One reliable algorithm for producing phylogenetically-interpretable low-

rank approximations of data is to construct basis elements through aggregation  
and contrast vectors (Figure 1c). An aggregation basis element for a group  
 $Q = R \cup S$  can be constructed through a vector whose  $i$ th element is

$$\mathbf{v}_{A_Q, i} = \begin{cases} a & i \in Q \\ 0 & \text{otherwise} \end{cases} \quad (2)$$

and such aggregation basis elements can be subsequently partitioned with a  
contrast vector

$$\mathbf{v}_{C_{R|S}, i} = \begin{cases} b & i \in R \\ -c & i \in S \\ 0 & \text{otherwise} \end{cases} \quad (3)$$

where  $b > 0$  and  $c > 0$ . By meeting the criteria

$$rb - sc = 0 \quad (4)$$

$$rb^2 + sc^2 = 1 \quad (5)$$

, one can ensure that  $\mathbf{v}_{A_Q}$  and  $\mathbf{v}_{C_Q}$  are orthogonal and with unit norm. These criteria are satisfied by

$$b = \sqrt{\frac{s}{r(r+s)}} \quad (6)$$

$$c = \sqrt{\frac{r}{s(r+s)}}. \quad (7)$$

In this case, the aggregation and contrast operations for sample  $j$  are

$$\begin{aligned} A(\mathbf{x}_{R,j}) &= \bar{\mathbf{x}}_{R,j} \\ C(A(\mathbf{x}_{R,j}), A(\mathbf{x}_{S,j})) &= \sqrt{\frac{rs}{r+s}} (\bar{\mathbf{x}}_{R,j} - \bar{\mathbf{x}}_{S,j}). \end{aligned} \quad (8)$$

where  $\bar{x}_{R,j}$  is the sample mean of species in group  $R$  and sample  $j$ . Projecting a dataset onto  $\mathbf{v}_{C_{R|S}}$  yields coordinates which are a standardized difference of means: the absolute value of the projection of a single multi-species sample onto a contrast vector yields the two-sample t-statistic from equation (1). The contrast vector is comprised of two sub-aggregations of opposite sign, one for group  $R$  and the other for group  $S$ . By ensuring criterion (4), the groups aggregated within a contrast vector can be subsequently partitioned with additional, orthogonal contrast vectors splitting each group  $R$  and  $S$ . Maintaining criterion (5), the aggregation and contrast vectors defined here can be used to construct an orthonormal basis for describing data containing our species,  $\mathbf{x}_j \in \mathbb{R}^m$ , by defining a set of  $q \leq m$  orthogonal aggregation vectors corresponding to disjoint sets of species  $Q_l$  such that the entire set of aggregations,  $\bigcup_{l=1}^q Q_l = \{1, \dots, n\}$ , covers the entire set of  $m$  species. Then,  $m - q$  contrast vectors partitioning the aggregations and the sub-aggregations within contrast vectors can complete the basis (Figure 1c). Of note is that, as defined in equations (2) and (3), the span of any aggregate and its contrast is equal to the span of the contrasts' sub-aggregates, i.e. for  $R \cup S = Q$ ,

$$\text{span}(\mathbf{v}_{A_Q}, \mathbf{v}_{C_{R|S}}) = \text{span}(\mathbf{v}_{A_R}, \mathbf{v}_{A_S}) \quad (9)$$

(Figure 1c) and the two natural ways of changing variables with the phylogeny, an aggregate of species and its orthogonal contrast (grouping species and partitioning the group) or two orthogonal aggregates (two disjoint groups of species), are rotations of one-another. Aggregation and contrast vectors translate the notion of phylogenetic scale and group-differences into a basis that can be used to analyze community ecological data.

Pure aggregation vectors as defined in equation (2) can be defined a priori based on traits or clades of species thought to be important for the question

at hand (e.g. aggregate “terrestrial” and “aquatic” animals), or defined by the data through myriad clustering algorithms or phylofactorization based purely on aggregation by converting steps (1) and (2) in the phylofactorization algorithm into a single step: maximizing an objective function of the aggregate of a clade. A special case occurs when data are compositional [1], in which case the sum of any sample across all species in the community will equal 1 and thus the data are constrained by an aggregation element - the aggregate of all species - which can only be subsequently contrasted. Phylofactorization via contrasts of log-relative abundance data allows one to construct an isometric log-ratio transform, a commonly used and well-behaved transform for the analysis of compositional data [10, 9, 44]. Since the span of an aggregate and its contrast is equal to the span of the contrasts’ two aggregates (equation 9), we simplify construction of the basis by considering, from here on out, only the “contrast basis” in which the an initial aggregate of all species is then partitioned with a series of contrasts.

An orthonormal basis, including one constructed via aggregation and contrast vectors, enables researchers to partition the variance captured by each of a set of orthogonal directions corresponding to discrete, identifiable features in the phylogeny. Using the phylofactorization algorithm, a dataset  $\mathbf{X} = [x]_{i,j}$  can be summarized by defining the objective function

$$\omega_e = \text{Var} [\mathbf{v}_{C_e}^T \mathbf{X}] \quad (10)$$

where  $\mathbf{v}_{C_e}$  is the contrast vector from (3) corresponding to the sets of species,  $R$  and  $S$ , split by edge  $e$ . Phylofactorization by variance-maximization yields a phylogenetic decomposition of variance, referred to as “phylogenetic components analysis” or PhyCA. PhyCA is a constrained version of principal components analysis, allowing researchers to focus only on the loadings,  $\mathbf{v}_{C_e}$ , corresponding

455 to contrasts of species separated by an edge.

456 The variance of component scores,  $\mathbf{y}_e = \mathbf{v}_{C_e}^T \mathbf{X}$ , can be easily understood if  
 457 the data  $[x_{i,j}]$  are assumed to be Gaussian. The component score for sample  $j$ ,  
 458  $\mathbf{y}_{e,j}$ , can be written as

$$\mathbf{y}_{e,j} = \sqrt{\frac{rs}{r+s}} (\bar{x}_{R,j} - \bar{x}_{S,j}) \quad (11)$$

459 where  $\bar{x}_{R,j}$  is the sample mean of  $x_{i,j}$  for  $i \in R$  and  $\bar{x}_{S,j}$  is the sample mean of  
 460  $x_{i,j}$  for  $i \in S$ . The variance of the component score across all samples  $j = 1, \dots, n$   
 461 is

$$\text{Var}[\mathbf{y}_e] = \frac{rs}{r+s} (\text{Var}[\bar{x}_R] + \text{Var}[\bar{x}_S] - 2\text{Cov}[\bar{x}_R, \bar{x}_S]). \quad (12)$$

462 The variance of  $\mathbf{y}_e$  increases through a combination of variances in aggregations  
 463 of groups  $R$  and  $S$  across samples ( $\bar{x}_R$  and  $\bar{x}_S$ , respectively) and a high negative  
 464 covariance between aggregations for groups  $R$  and  $S$  across samples. Species  
 465 with a negative covariance may be competitively excluding one-another or may  
 466 be differentiated due to a trait which arose along edge  $e$  which causes different  
 467 habitat associations or responses to treatments. Edges extracted from PhyCA  
 468 are edges along which putative functional ecological traits arose differentiating  
 469 the species in  $R$  and  $S$  in the dataset of interest.

470 **Phylogenetic Components of the American Gut** To illustrate, we per-  
 471 form PhyCA to identify 10 factors from a sub-sample of the American Gut  
 472 dataset and the greengenes phylogeny [8] containing  $m = 1991$  species and  $n =$   
 473 788 samples from human feces (Figure 3b). The American Gut dataset was fil-  
 474 tered to only fecal samples with over 50,000 sequence counts and, for those sam-  
 475 ples, otus with an average of more than one sequence count per sample. After  
 476 performing PhyCA, each identified resulting component score,  $\mathbf{y}_{e^*}$ , is assessed  
 477 for a linear association with seven explanatory variables: `types_of_plants` (a

question asking participants how many types of plants they’ve eaten in the past week), age, bmi, alcohol consumption frequency, sex, antibiotic use (ABX), and inflammatory bowel disease (subset\_ibd) (Figure 3b). The raw P-values are presented below, but for a reference, the P-value threshold for a 5% family-wise error rate is  $7.1 \times 10^{-4}$ .

The first factor splits 1229 species of Firmicutes from the remainder of microbes. The component score for the first factor,  $y_{e1}$ , is strongly associated with antibiotic use ( $P=3.6 \times 10^{-4}$ ), with dramatic decreases in relative abundance in patients who have taken antibiotics in the past week or month. The second factor identifies 217 species of several genera of Lachnospiraceae, a clade contained within the Firmicutes, strongly associated with age ( $P=1.2 \times 10^{-15}$ ) and bmi ( $P=3.2 \times 10^{-6}$ ) and alcohol ( $P=6.4 \times 10^{-3}$ ). The third factor is a clade of 81 Bacteroides most strongly associated with types\_of\_plants ( $P=2 \times 10^{-9}$ ). By identifying a clade of Bacteroides as a major axis of variation, factors 1 and 3 refine the Firmicutes to Bacteroidetes ratio commonly used to describe variation in the gut microbiome and found associated with obesity and other disease states [28, 7]. It’s been found that the Firmicutes/Bacteroidetes ratio changes with age [31], but the picture from phylofactorization is more nuanced: the large clade of Firmicutes in the first factor does not change with age, but the Lachnospiraceae within that clade decrease strongly with age relative to the remaining Firmicutes, while the Bacteroides show only a moderate decrease with age. The strong decrease with age in Lachnospiraceae is found in a few other clades within the Firmicutes: the 4th factor identified a clade of Firmicutes of the family Ruminococcaceae strongly associated with types of plants ( $P=3.6 \times 10^{-5}$ ), sex ( $P=5.9 \times 10^{-4}$ ) and decreasing with age ( $P=9.2 \times 10^{-4}$ ), and the 5th factor identified a group of Firmicutes of the family Tissierellaceae that decrease strongly with age ( $P=1.9 \times 10^{-5}$ ).



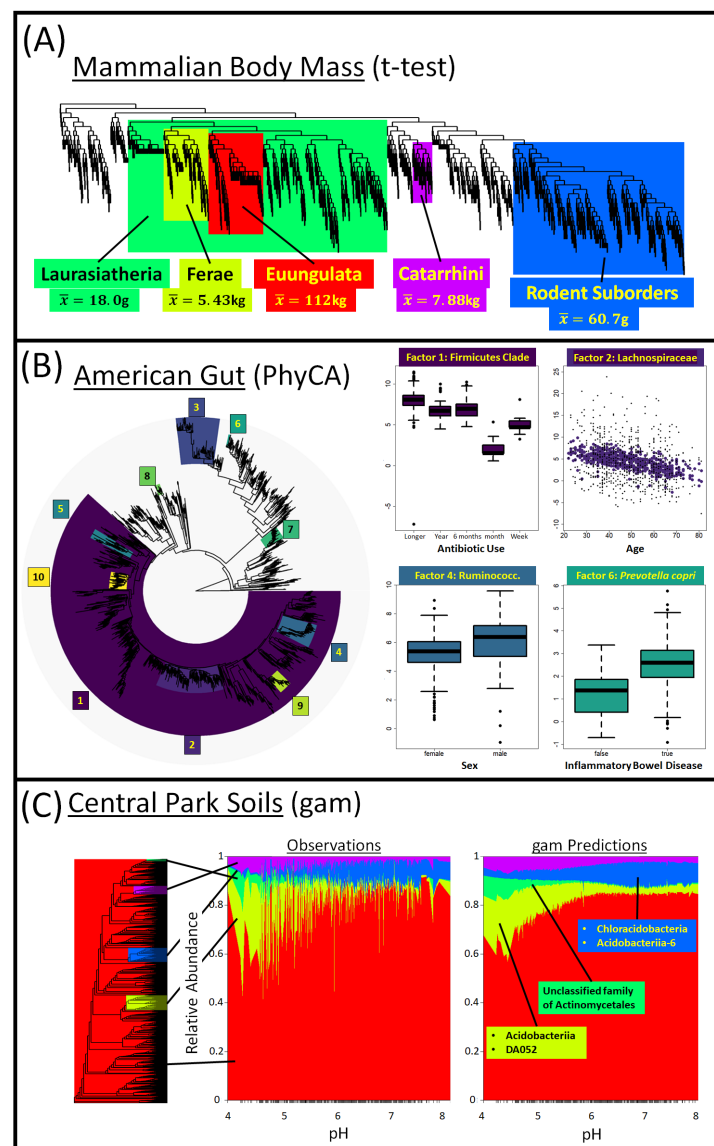

Figure 3: Phylofactorization with contrast basis. (A) The contrast basis defines variables similar to t-statistics, and maximizing the projection of data onto the contrast basis can identify phylogenetic factors. Five iterations of phylofactorization on a dataset of mammalian log-body mass yields five clades with very different body masses. (B) Maximizing the variance of component scores,  $y_e$ , of log-relative abundance data produces a “phylogenetic components analysis” (PhyCA) of the American Gut dataset. The most variable clades cover a range of phylogenetic scales. Downstream analysis of component scores tested associations with meta-data - plotted are linear predictors against relevant meta-data; the plot of Lachnospiraceae includes the raw data as black dots. (C) More complicated methods can be used, such as generalized additive modeling with  $y_e$ . Using the central park soils dataset,  $y_e$  of log-relative abundances, the model  $y_e \sim s(\log(\text{Carbon})) + s(\log(\text{Nitrogen})) + s(\text{pH})$ , and the objective of maximizing the explained variance, we obtained the same 4 factors obtained using generalized additive modeling in the original data, including the misnomer group of Chloracidobacteria that don't thrive in low pH environments. The relative importance of pH in the generalized additive models and exact clades with a high amount of variance explained by pH allows a projection of 3000 species into 5 BPUs for clear visualization of a dominant feature of how soil bacterial communities change along a key environmental gradient.

505 The sixth factor is a small group of 5 OTUs of *Prevotella copri* strongly as-  
 506 sociated with types\_of\_plants ( $P=2.8 \times 10^{-4}$ ) and inflammatory bowel disease  
 507 ( $P=2.5 \times 10^{-3}$ ). Previous studies have found that *Prevotella copri* abundances  
 508 are correlated with rheumatoid arthritis in people and inoculation of *Prevotella*  
 509 *copri* exacerbates colitis in mice. Consequently, *Prevotella copri* is hypothesized  
 510 to increase inflammation in the mammalian gut [42], and the discovery of *Pre-*  
 511 *votella copri* as one of the dominant phylogenetic factors of the American Gut, as  
 512 well as the discovery of its association with IBD, corroborates the hypothesized  
 513 relationship between *Prevotella copri* and inflammation. Likewise, the seventh  
 514 factor is a clade of 41 Gammaproteobacteria of the order Enterobacteriales also  
 515 associated with types\_of\_plants ( $P=6.7 \times 10^{-8}$ ) and weakly associated with  
 516 inflammatory bowel disease ( $P=0.022$ ). Gammaproteobacteria were used as  
 517 biomarkers of Crohn’s disease in a recent study [49] and their associations with  
 518 IBD in the American Gut project corroborates the possible use of Gammapro-  
 519 teobacterial abundances for detection of IBD from stool samples. Summaries of  
 520 the models for all factors’ component scores are in the supplemental information.

### 521 **Example 3: Compositional, log-normal and Gaussian regression-** 522 **phylofactorization**

523 Phylogenetic contrast vectors can be used to define more complicated objective  
 524 functions for data assumed to be Gaussian or easily mapped to Gaussian, such  
 525 as logistic-normal compositional data or log-normal data. Conversion of the  
 526 data to an assumed-Gaussian form can then allow one to perform least-squares  
 527 regression using  $\mathbf{y}_e$  as either an independent or dependent variable. Rather  
 528 than performing PhyCA and subsequent regression, one can choose phylogenetic  
 529 factors based on their associations with meta-data of interest.

530 Maximizing the explained variance from regression identifies clades through

the product of a high contrast-variance from equation (10) and the percent of explained-variance from regression - such clades can capture large blocks of explained variance in the dataset. Another common objective function is the deviance or  $F$ -statistic from regression which identifies clades with more predictable responses - such clades can be seen as bioindicators or particularly sensitive clades, even if they are not particularly large or variable clades in the data. Regression-phylofactorization can use the component scores as an independent variable, as was used in the phylofactorization-based classification of Crohn's disease [49]. For multiple regression, one can use the explanatory power of the entire model, or a more nuanced objective function of a subset of the model. More complicated regression models can be considered, including generalized additive models.

To illustrate the flexibility of regression phylofactorization to identify phylogenetic scales corresponding to nonlinear patterns of abundance-habitat associations, we perform a generalized additive model analysis of the Central Park soils dataset [39] analyzed previously using a generalized linear model. To identify non-linear associations between clades and pH, Carbon and Nitrogen, we perform a generalized additive model of the form

$$\mathbf{y}_e \sim s(\text{pH}) + s(\text{Carbon}) + s(\text{Nitrogen}) \quad (13)$$

and maximize the explained variance (Figure 3c). The resultant phylofactorizations identifies the same 4 factors as the generalized linear model, but allows nonlinear and multivariate analysis of how community composition changes over environmental meta-data. Combining the high relative-importance of pH with the identified 4 factors, splitting over 3,000 species 5 binned phylogenetic units, allows clear and simple visualization of otherwise complex behavior of how a community of several thousand microbes changes across several hundred soil

556 samples. As with the original analysis, the generalized additive modeling phylo-  
557 factorization identifies a clade of Acidobacteria - the Chloracidobacteria - which  
558 have highest relative abundances in more neutral soils.

## 559 **Example 4: Phylofactorization through generalized linear** 560 **models**

561 Many ecological data are not Gaussian. Presence-absence data or count data  
562 with many zeros cannot be easily transformed to yield approximately Gaus-  
563 sian random variables. However, the graph-partitioning algorithm we describe  
564 provides a framework for implementing phylofactorization with the appropriate  
565 choice of aggregation and contrast operations defined through more complex re-  
566 gression models. Data assumed to be exponential family random variables can  
567 be analyzed with regression-phylofactorization by adapting generalized linear  
568 models through shared coefficients and assumptions of within-group homogene-  
569 ity that allow algebraic group operations for aggregation within the exponential  
570 family. We present three options for aggregation and contrast in generalized  
571 linear models, intended to be an illustrative, but not exhaustive, account of the  
572 application of phylofactorization in the context of generalized linear and addi-  
573 tive models. These options correspond to the contrast basis, either explicitly  
574 using the contrast basis to approximate the coefficient matrix in multivariate  
575 generalized linear models, or performing shared-coefficient or factor-contrasts  
576 in generalized linear modeling which, we'll show later, have a similar graph-  
577 topological behavior as the contrast basis.

578 The first method is to perform multivariate generalized modeling of one  
579 generalized linear model or generalized additive model using the same formula  
580 for each species and subsequently use contrast basis elements,  $\mathbf{v}_{C_e}$ , to change the  
581 basis for regression parameters of interest - such expansions of the maximum-

likelihood estimates of regression coefficients are maximum likelihood estimates of the expansion by the invariance of maximum likelihood estimates. To be precise, given an  $m \times p$  matrix,  $B$ , of coefficients used in regression on species-specific data. In particular, generalized linear models will model the predictors,  $\eta \in \mathbb{R}^s$ , for each species through a linear model

$$\eta \sim BZ. \quad (14)$$

Instead of using the exhaustive  $s \times p$  list of coefficients, one can represent the coefficient matrix  $B$  through contrast basis elements and their component scores

$$B = \mathbf{1}w_0^T + VW + \epsilon \quad (15)$$

where  $\mathbf{1} \in \mathbb{R}^s$  is the one vector,  $w_0 \in \mathbb{R}^p$  contains the sum of the regression coefficients for each of the  $p$  predictors,  $V \in \mathbb{R}^{s \times K_t}$  is a matrix whose columns are contrast basis elements and  $W \in \mathbb{R}^{K_t \times p}$  is a matrix whose rows are the component scores for each contrast basis element. One example of an objective function guiding the choice of contrast basis elements can be the norm

$$\omega_e = ||v_{C_e}^T B|| \quad (16)$$

which captures the extent to which coefficients in  $B$  are different between the sets of species partitioned by the edge  $e$ . Another option for an objective function is the deviance of a reduced model with shared coefficients.

Other options for aggregation and contrast exploit the factor-contrasts built into generalized linear and additive modeling machinery. Factor contrasts, such as a variable  $g \in \{R, S\}$  indicating which group a species is in, can capture the assumption of shared coefficients within-groups and different coefficients

601 between-groups in multivariate generalized linear modeling across all species. A  
 602 third option is to assume within-group homogeneity and aggregate exponential  
 603 family random variables to a “marginally stable” exponential family random  
 604 variable used for analysis. Marginal stability, to the best of our knowledge, has  
 605 not been explicitly defined elsewhere, and thus we introduce the term here by  
 606 loosening the definition of stable distributions [41].

607 **Stable distribution** A distribution with parameters  $\theta$ ,  $\mathcal{F}(\theta)$ , is said to be  
 608 stable if a linear combination of two independent random variables from  $\mathcal{F}(\theta)$   
 609 is also in  $\mathcal{F}(\theta)$ , up to location and scale parameters.

610 **Marginally stable distribution** A distribution with parameters  $\{\theta_1, \theta_2\}, \mathcal{F}(\theta_1, \theta_2)$ ,  
 611 is said to be marginally stable on  $\theta_1$  if  $\mathcal{F}(\theta_1, \theta_2)$  is it is stable conditioned on  $\theta_1$   
 612 being fixed.

613

614 For example, the Gaussian distribution is stable: the sum of two Gaus-  
 615 sian random variables is also Gaussian. Meanwhile, binomial random variables  
 616  $\text{Binom}(\rho, N)$  are marginally stable on  $\rho$ ; random variables  $x_i \sim \text{Binom}(\rho, N_i)$   
 617 can be summed to yield  $A(\mathbf{x}) \sim \text{Binom}(\rho, \sum N_i)$ . The marginal stability can  
 618 also be used with transformations that connect the assumed distribution of the  
 619 data to a marginally stable distribution. Log-normal random variables can be  
 620 converted to Gaussians through exponentiation; chi random variables can be  
 621 converted to chi-squared through squaring - random variables from many dis-  
 622 tributions may be analyzed by transformation to a stable or marginally stable  
 623 family of distributions. Such transformation-based analyses implicitly define  
 624 aggregation through a generalized  $f$ -mean

$$A_f(\mathbf{x}_R) = f^{-1} \left( \sum_{i \in R} f(x_i) \right) \quad (17)$$

where  $f(x) = \log(x)$  for log-normal random variables,  $f(x) = x^2$  for Chi random variables, etc. The goal of such aggregation, whether through exploiting marginal stability or generalized  $f$ -means or other group operations in the exponential family, is to produce summary statistics for each group,  $R$  and  $S$ , in a manner that permits generalized linear modeling of the summary statistics. By ensuring summary statistics are also exponential-family random variables, one can perform a factor-contrast style analysis as described above but only on the two summary statistics and not on all  $s$  species. Doing so can greatly reduce the computational load of phylofactorizing large datasets and, as we show below, can increase the power of edge-identification even when the within-group homogeneity assumption does not hold. Marginal stability, for the purposes of phylofactorization, must be on the parameter of interest in generalized linear modeling (Figure 3a).

Marginal stability opens up more distributions to stable aggregation. Presence absence data, for instance, can be assumed to be Bernoulli random variables. The assumption of within-group homogeneity for the probability of presence,  $\rho$ , allows addition of Bernoulli random variables within each group,  $R$  and  $S$ , to yield a respective binomial random variable,  $x_R$  and  $x_S$ . Likewise, the addition of a group of binomial random variables with the same probability of success,  $\rho$ , yields an aggregate binomial random variable. A homogeneous group of exponential random variables with the same rate parameter,  $\lambda$ , can be added to form a gamma random variable. Gamma random variables,  $x_i \sim \text{Gamma}(\kappa_i, \theta)$ , parameterized by their shape,  $\kappa_i$ , and scale,  $\theta$ , are marginally  $A$ -stable on  $\theta$ . Addition of geometric random variables with the same rate parameter forms a negative binomial, and the addition of a group of negative binomial random variables,  $x_i \sim \text{NB}(\pi_i, \rho)$ , with the same probability of success  $\rho$  but different numbers of failures,  $\pi_i$ , can be aggregated into

652  $x_R = \sum_{i \in R} x_i$  where  $x_R \sim NB(\sum_{i \in R} \pi_i, \rho)$ . All of these distributions are not  
653 stable, but they are marginally stable.

654 For a practical example of regression phylofactorization of an exponential  
655 family random variable, we consider a presence/absence dataset  $\mathbf{X}$ , whose en-  
656 tries  $x_{i,j}$  are assumed to be Bernoulli random variables with some probability  
657 dependent upon meta-data,  $\rho_{i,j}(\mathbf{Z})$ , modeled naturally through the canonical  
658 link function,  $\eta$ . Phylofactorization can identify edges which separate species  
659 based on their response to a set of environmental variables,  $\{\mathbf{z}_k\}$ . For exam-  
660 ple researchers sequencing microbial 16S sequences in the soil may have data  
661 on the presence/absence of microbes across a range of biomass, pH, and nitro-  
662 gen concentrations and be interested in identifying the edges that best separate  
663 microbes based on differential probability of presence in response to nitrogen,  
664 controlling for common responses to biomass and group-specific responses to pH.  
665 Such questions can be addressed through appropriate choice of factor contrasts  
666 in a generalized linear model, with the optional use of within-group homogeneity  
667 to allow aggregation of presence/absences to binomial random variables.

668 A more general formula for phylofactorization based on predictors in regres-  
669 sion models for exponential family random variables can be made by partitioning  
670 the independent variables,  $\{z_k\}_{k=1}^P$ , into three disjoint sets: a set U of universal  
671 effects assumed to have a common effect across species, a set B of group-specific  
672 effects one wishes to control for, and a set P of group-specific effects one wishes  
673 to use for phylofactorization. Instead of a species-specific, multivariate general-  
674 ized linear model of the predictor for each species  $i$ ,  $\eta_i$ ,

$$\eta_i = \beta_{i,0} + \beta_{i,1}z_1 + \dots + \beta_{i,p}z_p, \quad (18)$$

675 one can define a factor,  $g \in \{R, S\}$ , which indicates which group a species is  
676 in (or, for aggregated data  $A(\mathbf{x}_R)$ , which group the aggregate corresponds to),



and construct a generalized linear model

$$\eta = \sum_{l \in U} \beta_l z_l + g \times \sum_{j \in B} \beta_j z_j + g \times \sum_{k \in P} \beta_k z_k, \quad (19)$$

where  $g \times z_j$  indicates an interaction term between the group factor and the independent variable  $z_j$ . For example, a data frame contrasting the counts of “birds” from “non-birds” can be constructed as follows

| Site | Species | Abundance | $z_1$ | $z_2$ | $g$ |
|------|---------|-----------|-------|-------|-----|
| 1    | Sparrow | 10        | 1     | .5    | $R$ |
| 1    | Dove    | 8         | 1     | .5    | $R$ |
| 1    | Lizard  | 1         | 1     | .5    | $S$ |
| 1    | Mouse   | 3         | 1     | .5    | $S$ |
| 1    | Cat     | 1         | 1     | .5    | $S$ |
| 2    | Sparrow | 2         | 0     | -2    | $R$ |
| 2    | Dove    | 1         | 0     | -2    | $R$ |
| 2    | Lizard  | 10        | 0     | -2    | $S$ |
| 2    | Mouse   | 4         | 0     | -2    | $S$ |
| 2    | Cat     | 3         | 0     | -2    | $S$ |
| ...  | ...     | ...       | ...   | ...   | ... |

and a generalized linear model for a count family (e.g. Poisson, binomial, or negative binomial) with the formula

$$\text{Abundance} \sim z_1 + g \times z_2$$

can be used for maximum likelihood estimation of  $g$ , the factor which contrasts birds from non-birds whose coefficient or deviance can be used as the objective function.

The contrast function is defined through the factor-contrast, and one exam-

ple of an objective function is an omnibus test for all interaction terms between  $g$  and predictors for phylofactorization,  $P$ , relative to the model containing only the terms from  $U$  and  $B$ . Another example of an objective function can be the  $L_2$  norm of the coefficients  $\vec{\beta}_P$  of interest for phylofactorization. For the example with carbon, pH, and nitrogen, one can perform phylofactorization to identify edges differentiating microbial presence-absences (or negative binomial sequence-counts) through factor-contrasts in the model

$$\eta = \text{Carbon} + g \times \text{pH} + g \times \text{Nitrogen}. \quad (20)$$

The same principle of optional aggregation to marginally stable distributions followed by factor-contrasts can be applied to perform phylofactorization of exponential family random variables through generalized additive models.

These two approaches are by no means an exhaustive list of how to integrate generalized linear modeling into phylofactorization. For instance, it may be possible to perform phylofactorization by representing a vector of canonical link functions for two groups or multiple species,  $\eta$ , in terms of “canonical contrasts” using an aggregation-contrast basis defined above. The examples included are intended to illustrate the feasibility and creative options for robust and statistically well-calibrated phylofactorization of datasets comprised of non-Gaussian random variables.

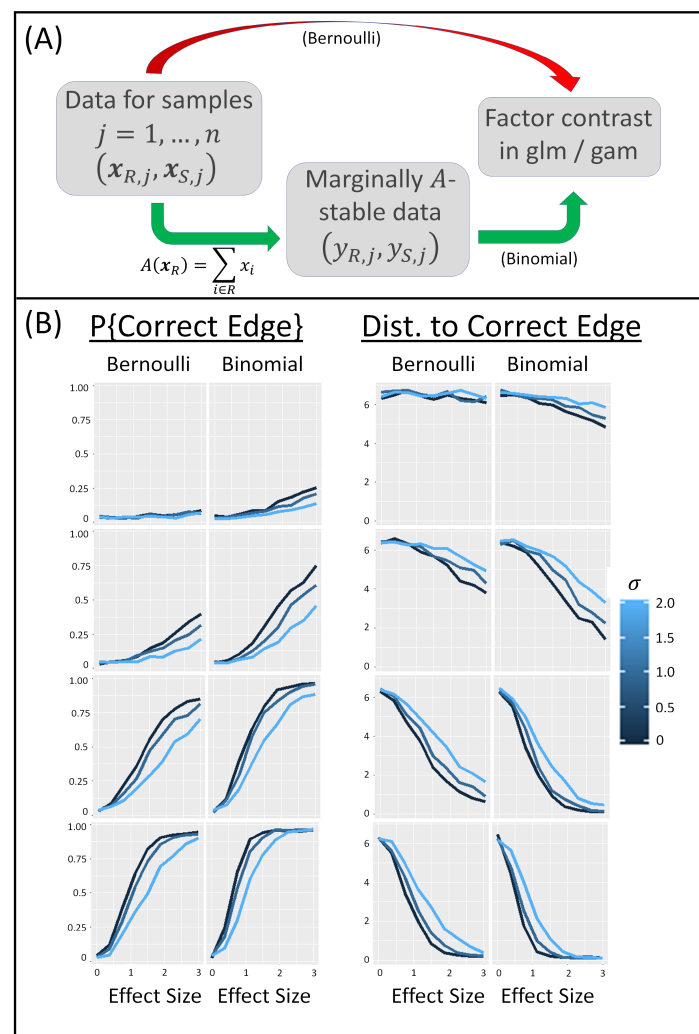

Figure 4: Factor contrasts can be used to define objective functions for phylofactorization of exponential family random variables. (A) Each edge separates the species in a sample into two groups. These groups can be used as factors directly in a generalized linear model as in equation 13. Alternatively, a within-group homogeneity assumption can be used to aggregate data of many exponential family random variables to a marginally stable distribution, such as addition of Bernoulli random variables with the same probability of success to obtain a binomial random variable, or addition of exponential random variables with the same rate parameter to obtain a gamma random variable. Regression on marginally stable random variables may dramatically reduce computational costs and improve accuracy. (B) Simulations of Bernoulli presence/absence data of 30 species with a random phylogeny suggest that aggregation to binomial improves power across a range of effect sizes,  $\delta$ , (x-axis), sample sizes,  $n$  (rows), and within-group heterogeneity,  $\sigma$  (see supplemental info for more details on the simulations). In all cases considered here, aggregation of presence-absence data to binomial random variables for subsequent factor-contrasts outperformed the raw factor contrast of Bernoulli presence-absence data, suggesting it is at least a viable tool for large datasets, but the generality of improved power of regression on surrogate, marginally stable aggregates remains to be seen.

To test and compare the viability of the two proposed methods - raw factor contrasts and aggregation to a marginally stable distribution - we simulated 700 replicates of effects of the form in equation (13) for the probability of presence on random edges, with varying effect sizes, sample sizes and within group homogeneity. For 700 replicates for each combination of sample size  $n \in \{5, 10, 30, 60\}$ , effect size  $\delta \in \{0, 0.375, 0.75, 1.125, 1.5, 1.875, 2.25, 2.625, 3\}$ , and within-group variance  $\sigma \in \{0, 1, 2\}$ , we simulated three explanatory variables  $\{z_1, z_2, z_3\}$  as independent, identically distributed  $n$ -vectors of standard normal random variables. The log-odds of presence for individual  $i$  in group  $R$  or group  $S$  was modeled as

$$\begin{aligned}\eta_{R,i} &= z_1 + z_2 + \left(0.1 + \frac{\delta}{2}\right) z_3 + z_{4,i} \\ \eta_{S,i} &= z_1 - z_2 + \left(0.1 - \frac{\delta}{2}\right) z_3 + z_{4,i}\end{aligned}\tag{21}$$

where  $z_{4,i} \stackrel{i.i.d.}{\sim} N(0, \sigma^2)$  are independent Gaussian random variables particular to the individual and sample. The data were either kept as Bernoulli random variables or aggregated via summation to binomial random variables and then analyzed using factor contrasts in a generalized linear model of the form

$$\eta = z_1 + g \times z_2 + g \times z_3.\tag{22}$$

The objective function was the deviance from the final term,  $g \times z_3$ . The probability of identifying the correct edge and the distance between the identified and correct edge (in the number of nodes separating the two edges) are plotted in Figure 4b. The method of factor-contrasts for glm-phylofactorization asymptotically approaches perfect edge-identification, both in the probability of detecting the correct edge and in distance from the correct edge, as the sample sizes and effect sizes increase. Aggregation to binomial and subsequent factor-contrast of

the aggregates slightly improved the power of edge-identification in these simulations. While the performance of the Bernoulli to binomial aggregation may decrease with differences in within-group means as opposed to an addition of individual within-group variance through  $z_{4,i}$ , our purpose here is to illustrate that there exist methods of aggregation and contrast which permit maximum-likelihood regression-phylofactorization of exponential family random variables. Marginally-stable aggregation and stepwise construction of factor contrasts are but one viable way to extend regression-phylofactorization to exponential family random variables.

## Phylogenetic factors of space and time

So far, we've demonstrated phylofactorization through examples of cross-sectional data, either through two-sample tests of cross-sections of species or through analyses of contrast-basis projections or factor contrasts in communities sampled across a range of meta-data. Phylofactorization can also be used in conjunction with many analyses of spatial and temporal patterns. Samples of a community over space can be projected onto contrast basis elements and the resulting component scores,  $y_e$ , can be analyzed much like PhyCA to identify the phylogenetic partitions of community composition over space. Spatial samples can also be analyzed using factor contrasts as defined for generalized linear models. Multivariate Autoregressive Integrated Moving Average (ARIMA) models can be constructed either as ARIMA models of the component scores,  $y_e$ , or as multivariate ARIMA models with factor contrasts as used in generalized linear models perform phylogenetic partitions based on differences in drift, volatility, and other features of interest.

Marginal stable aggregation in spatial and temporal data requires a more complex consideration of the marginal stability of spatially explicit random vari-

able and stochastic processes. Stability”, for spatially and temporally explicit random variables, must preserve the underlying model for the spatial or temporal process being used for analysis. An example of marginally stable aggregation and analysis of time-series data is the stability of neutral drift (sensu Hubbell [22]) to grouping and the use of a constant volatility transformation for neutrality testing.

Neutral communities fluctuate, and those fluctuations have a drift and volatility unique to neutral drift. Neutral drift can also be defined either by discrete, finite-community size urn processes or stochastic differential equations for the continuous approximations of finite but large communities. Recently, Washburne et al. [50] articulated the importance of a feature of neutral drift which enables time-series neutrality tests: its invariance to grouping of species. If a stochastic process of relative abundances,  $\mathbf{X}_t$ , obeys the probability law defined by neutral drift (either for discrete, finite communities or their continuous approximations, referred collectively as “neutral process”), then any disjoint groupings of  $\mathbf{X}_t$  is also a neutral process. Thus, neutral processes are stable to aggregation by grouping or summation of relative abundances. Collapsing all species into two disjoint groups,  $R$  and  $S$ , yields a two-dimensional neutral drift well-define neutrality test for time-series data. Specifically, if  $\mathbf{X}_t$  is a Wright Fisher process and  $R$  and  $S$  are disjoint groups whose union is the entire community, the quantity

$$\nu_t = \arcsin \left( \left( \sum_{i \in R} X_{i,t} \right) - \left( \sum_{j \in S} X_{j,t} \right) \right) \quad (23)$$

has a constant volatility which serves as a neutrality test for time-series data. Thus, phylofactorization can be done to partition edges across which the dynamics appear to be the least neutral. For the test developed by Washburne

et al., the aggregation operation is the  $L_1$  norm and the contrast operation is subtraction:

$$\begin{aligned} A(\mathbf{x}_R) &= |\mathbf{x}_R| \\ C(A(\mathbf{x}_R), A(\mathbf{x}_S)) &= A(\mathbf{x}_R) - A(\mathbf{x}_S) \end{aligned} \quad (24)$$

and the objective function,  $\omega$ , for edge  $e$  is the test-statistic of a homoskedasticity test of  $\arcsin(C_e)$ . Neutrality is a relative measure - biological units are neutral relative to one-another - and thus the use of aggregation of species into a unit and a contrast of two units is a natural connection between the theory and operations of phylofactorization and the concept of neutrality.

Whether the data are cross-sectional or spatially/temporally explicit, phylofactorization can be implemented through analysis of data projected onto the contrast basis, factor contrasts in autoregression, or model-specific marginally-stable aggregation and contrast such as that demonstrated for neutrality testing of time-series data.

## Statistical Challenges

We present a unifying algorithm which partition organisms into functional groups by identifying meaningful differences or contrasts along edges in the phylogeny. Phylofactorization is formally defined as a graph-partitioning algorithm. However, maximizing the variance of the data projected onto contrast basis elements corresponding to edges in the phylogeny is a constrained principal components analysis. The use of regression-based objective functions and the iterative construction of a low-rank approximation of a data matrix is similar to factor analysis. The discovery of a sequence of orthogonal factor contrasts in generalized linear models is a form of stepwise or hierarchical regression. The maximization of the objective function at each iteration is a greedy algorithm. Each of these

connections between phylofactorization and other classes of methods produces a body of literature from related methods which could inform phylofactorization. The relation of phylofactorization to pre-existing methods presents a suite of opportunities for rapid development of this exploratory tool into a more robust, inferential one.

There are statistical challenges common across many methods for phylofactorization. In this section, we enumerate some of the statistical challenges and discuss work that has been done so far. First, as with any method using the phylogeny as a scaffold for creating variables or making inferences, the uncertainty of the phylogeny and the common use of multiple equally likely phylogenies warrant consideration and further method development. Other challenges discussed here are: understanding the propagation of error; development of Metropolis algorithms to better arrive at global maxima; the appropriateness, and error rates, of phylofactorization under various evolutionary models underlying the effects (e.g. trait differences, habitat associations, etc.) and residuals in our data; understanding graph-topological biases and confidence regions; cross-validating the partitions and inferences from phylofactorization; determining the appropriate number of factors and stopping criteria to stop a running phylofactorization algorithm; and understanding the null distribution of test-statistics when objective functions being maximized are themselves test-statistics from a well-known distribution. Any exploratory data analysis tool can be made into an inferential tool with appropriate understanding of its behavior under a null hypothesis, and the connections of phylofactorization to related methods can accelerate the development of well-calibrated statistical tests for phylogenetic factors.

**Phylogenetic inference** So far we have assumed that the phylogeny is known and error free, but the true evolutionary history is not known - it is estimated. Consequently, phylofactorizations are making inferences on an uncertain scaffold.



fold - the more certain the scaffold, the more certain our inferences about a  
clade. Two challenges remain for dealing with phylofactorization on an uncer-  
tain phylogeny. For a consensus tree, there is the question of what statistics of  
the consensus are most easily integrated for precise statements of uncertainty  
in phylofactorization inferences. Bootstrapped confidence limits for monophyly  
[12] are the most commonly used statement of uncertainty for a consensus tree,  
but there may be others as well. Different organisms will have different lever-  
ages in regression or two-sample test phylofactorization, and thus monophyly  
is only part of the picture: leverage is another. For a set of equally likely  
bootstrapped trees, there is a need to integrate phylofactorization across trees.  
Phylofactorization of bundles of phylogenies has not yet been done, but may be  
a fruitful avenue for future research. One last option for researchers with trees  
containing clades with low bootstrap monophyly is to lower the resolution of the  
tree. Phylofactorization can still be performed on a tree with polytomies - the  
mammalian phylogeny used above contained many - and reducing the number  
of edges considered at each iteration can focus statistical effort (and chances of  
false-discovery) on clades about which the researcher is more certain.

**Propagation of error** Phylofactorization is a greedy algorithm. Like any  
greedy algorithm, the deterministic application of phylofactorization is non-  
recoverable. Choosing the incorrect edge at one iteration can cause error to  
propagate, potentially leading to decreased reliability of downstream edges. Lit-  
tle research has been done towards managing the propagation of error in phylo-  
factorization, but recognizing the method as a greedy algorithm suggests options  
for improving performance. Stochastic-optimization schemes, such as replicate  
phylofactorizations using Metropolis algorithms and stochastic sampling as im-  
plemented in the mammalian tree phylofactorization (sampling of edges with  
probabilities increasing monotonically with  $\omega_e$  and picking the phylofactor ob-

ject which maximizes a global objective function), may reduce the risk of error cascades in phylofactorization [20]. We leave this important problem, and the construction of suitable algorithms, to future research.

**Behavior under various evolutionary models** Phylofactorization is hypothesized to work well under a punctuated-equilibrium model of evolution or jump-diffusion processes [15, 26] in which jumps are infrequent and large, such as the evolution of vertebrates to land or water. If few edges have large changes in functional ecological traits underlying the pattern of interest, phylofactorization is hypothesized to work well. Phylofactorization may also work well when infrequent life-history traits arise or evolutionary events occur (such as ecological release) along edges and don't yield an obvious trait but instead yield a correlated, directional evolution in descendants. Phylofactorization of mammalian body sizes yielded a scenario hypothesized to be in this category. In this case the exact trait may not have arisen along the edge identified, but a precursor trait, or a chance event such as extinctions or the emergence of novel niches, may precipitate downstream evolution of the traits underlying phylofactorization. Both aggregation and contrast functions can incorporate phylogenetic structure and edge lengths to partition the tree based on likelihoods of such evolutionary models. The sensitivity of phylofactorization to alternative models, such as the myriad Brownian motion and Ornstein-Uhlenbeck models commonly used in phylogenetic comparative methods [13, 19], remains to be tested and will likely vary depending on the particular method used.

**Basal/distal biases** Researchers may be interested in the distribution of factored edges in the tree. If a dataset of microbial abundances in response to antibiotics is analyzed by regression-phylofactorization and results in many tips being selected, a researcher may be interested in quantifying the probability of

864 drawing a certain number of tips given  $t$  iterations of phylofactorization. Alter-  
 865 natively, if several edges are drawn in close proximity researchers may wonder  
 866 the probability of drawing such clustered edges under a null model of phylofac-  
 867 torization. For another example, researchers may wonder if the number of im-  
 868 portant functional ecological traits arose in a particular historical time window  
 869 (e.g. due to some hypothesis of important evolutionary event or environmental  
 870 change), and thus want to test the probability of drawing as many or more  
 871 edges than observed under a null model of phylofactorization. All of these tests  
 872 would require an accurate understanding of the probability of drawing edges in  
 873 different locations of the tree.

874 All methods described here, save the Fisher exact test, have a bias for tips  
 875 in the phylogeny (Figure 5a). Such biases affect the calibration of statistical  
 876 tests of the location of phylogenetic factors, such as a test of whether/not there  
 877 is an unusually large number of differentiating edges in mammalian body mass  
 878 during or after the K-Pg extinction event.

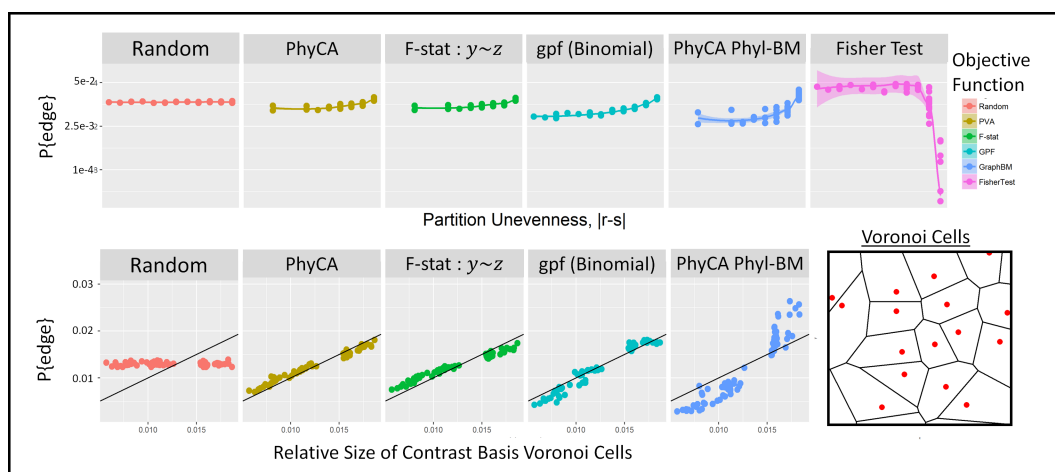

**Figure 5: Graph topological bias in null data and the relative size of Voronoi cells of contrast basis elements.** The method and the null distribution determine graph-topological bias of phylofactorization, but many methods share a common source of bias. A random draw of edges does not discriminate against edges based on the relative sizes of two groups contrasted by the edge, but 16,000 replicate phylofactorizations of null data reveal that contrast-basis methods are slightly biased towards uneven splits (e.g. tips of the phylogeny). Standard Gaussian null data were used for PhyCA, F-statistics from regression on contrast basis elements ( $y_e \sim z$ ), and binomial null data was used for generalized phylofactorization (gpf) through marginally-stable aggregation. Other methods, such as Fisher’s exact test of a vector of Bernoulli random variables, have opposite biases. The tip-bias of contrast-basis analysis is amplified for marginal-stable aggregation in generalized phylofactorization, and amplified even more if the null data have residual structure from a Brownian motion diffusion along the phylogeny (Phyl-BM). The common bias when using contrast bases across a range of objective functions is related to the uneven relative sizes of Voronoi cells produced by the bases, simulated here by equation (26).

Phylofactorization using the contrast basis is biased towards the tips of the tree. Some progress can be made towards understanding the source of basal/distal biases in phylofactorization via the contrast-basis. The biases from analyses of contrast basis coordinates,  $\mathbf{y}_e$ , stem from a common feature of the set of  $K_t$  candidate basis elements  $\{\mathbf{v}_{C_e}\}_{e=1}^{K_t}$  considered at iteration  $t$  of phylofactorization. For the example of the t-test phylofactorization of a vector of data,  $\mathbf{x}$ , the winning edge  $e^*$  is

$$e^* = \operatorname{argmax}_e |\mathbf{v}_{C_e}^T \mathbf{x}|. \quad (25)$$

886 If all basis elements have unit norm, which they do under equation (5), then  
 887 each basis element being considered corresponds to a point on an  $m$ -dimensional  
 888 unit hypersphere. If the data,  $\mathbf{x}$ , are drawn at random, such that no direction  
 889 is favored over another, the probability that a particular edge  $e$  is the winning  
 890 edge is proportional to the relative size of its Voronoi cell on the surface of the  
 891 unit  $m$ -hypersphere. Thus, the basal/distal biases for contrast-basis analyses  
 892 with null data assumed to be drawn from a random direction can be boiled  
 893 down to calculating or computing the relative sizes of Voronoi cells. For our  
 894 simulation, we estimated the size of Voronoi cells through matrix multiplication

$$\mathbf{Y}_{null} = \mathbf{V}^T \mathbf{X}_{null} \quad (26)$$

895 where  $\mathbf{V}$  is a matrix whose columns  $j$  is the contrast basis elements for edge  
 896  $e_j$  being considered and  $\mathbf{X}_{null}$  is the dataset simulated under the null model  
 897 of choice whose columns are independent samples  $\mathbf{x}_j$ . Each column of  $\mathbf{Y}_{null}$   
 898 contains the projections of a single random vector - the element of each column  
 899 with the largest absolute value is the edge closest to that random vector.

900 **Graph-topology and confidence regions** As a graph-partitioning algo-  
 901 rithm, phylofactorization also invites a novel description of confidence regions  
 902 over the phylogeny. The graph-topology of our inferences - edges, and their  
 903 proximity to other edges, both on the phylogeny and in the  $m$ -dimensional hy-  
 904 persphere discussed above - can be used to refine our statements of uncertainty.  
 905 95% Confidence intervals for an estimate, e.g. the sample mean, give bounds  
 906 within which the true value is likely to fall 95% of the time in random draws of  
 907 the estimate. Confidence regions are multi-dimensional extensions of confidence  
 908 intervals. Conceptually, it's possible to make similar statements regarding phy-  
 909 logenetic factors - confidence regions on a graph indicating the regions in which

910 the true, differentiating edge is likely to be.

911       Extending the concept of confidence regions to the graph-topological infer-  
 912 ences from phylofactorization requires useful notions of distance and “regions” in  
 913 graphs. One example of such a distance between two edges is a walking distance:  
 914 the number of nodes one crosses along the geodesic path between two edges. Al-  
 915 ternatively, one could define regions in terms of years or branch-lengths. The  
 916 issue of confidence regions on graphs is conceptually possible and may prove im-  
 917 portant for statements of certainty in phylogenetic factorization; it is an area of  
 918 fruitful, future research. Defining confidence regions in phylofactorization must  
 919 combine the uneven Voronoi cell sizes as well as the geometry of the contrast  
 920 basis. For low effect sizes, confidence regions extend generously to edges whose  
 921 contrast basis have a large relative Voronoi cell size (e.g. the tips). As the effect  
 922 sizes increase, confidence regions over the graph can be described in terms of  
 923 angular distances between the contrast basis elements and that of the winning  
 924 edge,  $e^*$  (Figure 6).

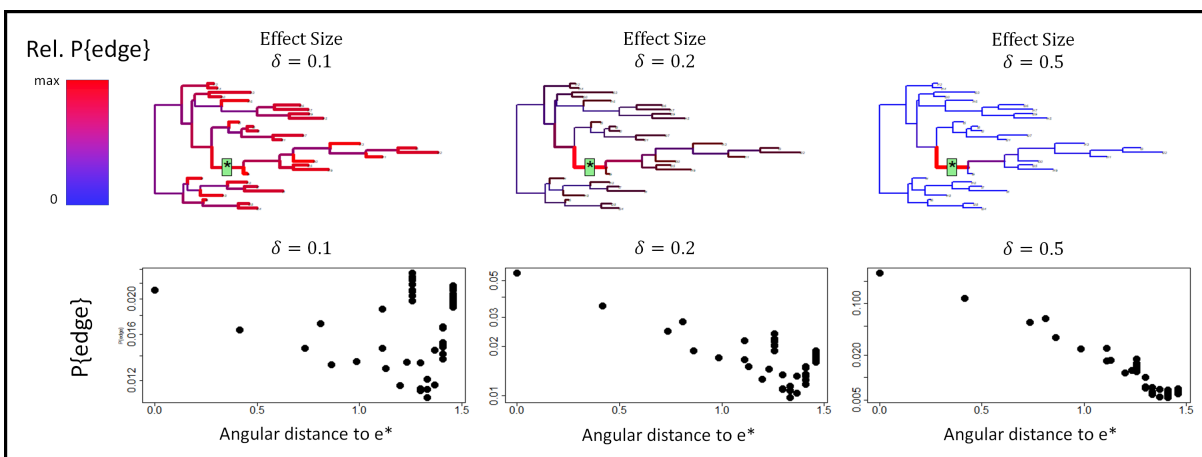

**Figure 6: Graph-topological confidence regions for phylofactorization.** It may be possible to describe confidence regions around inferred edges by defining distances relevant to the method and graph topology. A tree with 30 species was given a fixed effect about edge  $e^*$  in their mean values as a function of meta-data  $z \sim Gsn(\pm\delta/2, 1)$ .  $7 \times 10^5$  iterations of phylofactorization were run and the relative probability of drawing each edge was visualized through both the color and width of the edge. The relationship between the angular distance of an edge's contrast basis element to that of  $e^*$  and the probability of drawing the edge suggests that for low effects, confidence intervals must incorporate a mix of tip-bias and angular distance, but larger effect sizes, in which the edge drawn is correctly in the neighborhood of  $e^*$ , the angular distance may provide a tractable method for defining confidence regions around the location of inferred phylogenetic factors.

**Cross-validation** How do we compare phylofactorization across datasets to cross-validate our results? If a researcher observes a pattern in the ratio of squamates to mammalian abundances in North America, say a decrease in the ratio of lizard and snake to mammal abundance with increasing altitude, they may wish to cross-validate their findings in other regions, including regions with few or none of the same species in the original study. Researchers replicating the study in Australia and New Zealand would have to grapple with whether or not to include monotremes in their grouping of “mammals” and whether or not to include the tuatara, a close relative of squamates, in their grouping of “squamates” - such branches were basal to the squamate & mammalian clades contrasted in the hypothetical North American study.

936       Phylofactorization formalizes the issues arising with such phylogenetic cross-  
 937 validation (Figure 7). If all species in the training/testing datasets can be  
 938 located on a universal phylogeny, phylofactorization of a training set of species  
 939 and data identifies edges or links of edges in the training phylogeny which are  
 940 guaranteed to correspond to edges or links of edges in the universal phylogeny.  
 941 The testing set of species may introduce new edges to the phylogeny which  
 942 interrupt the links of edges in the universal phylogeny along which training  
 943 contrasts were conducted. In the example above, the tuatara and monotremes  
 944 all interrupt the link of edges separating North American mammals from North  
 945 American reptiles on the universal phylogeny.

946       Robust cross-validation for phylofactorization requires directly addressing  
 947 the issues arising from the interruptions of edges produced by novel species.  
 948 Interruptions may be either ignored, or used to refine the inference. Returning  
 949 to the previous example, one can use the presence of monotremes and tuatara to  
 950 refine the definition of North American mammals to mean “all mammals” and  
 951 “all placental and marsupial mammals”, and likewise one can optionally refine  
 952 the definition of “squamates” to the broader “Lepidosauria” clade.



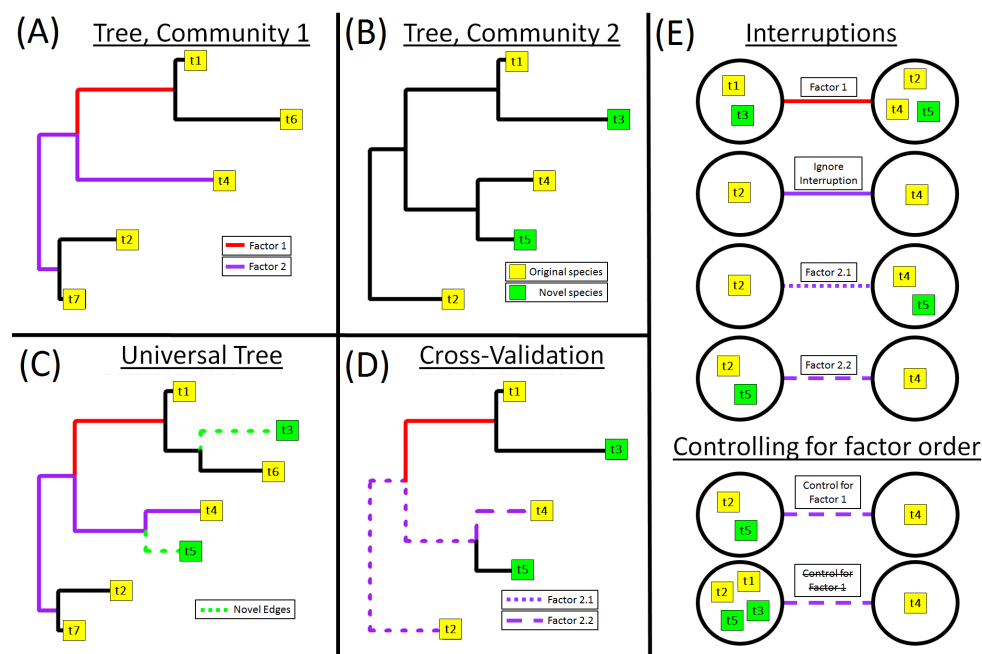

Figure 7: Graph-topological considerations with cross-validation. (A) The training community has 5 species (yellow boxes) split into two factors. The second factor forms a partition separating  $t_4$  from  $\{t_2, t_7\}$ . The second factor does not correspond to a single edge, but instead a chain of two edges. (B) A second, testing community is missing species  $t_6$  and  $t_7$  and contains novel species  $t_3$  and  $t_5$  (green boxes). (C) All factors can be mapped to chains of edges on a universal phylogeny. Novel species “interrupt” edges in the original tree; cross-validation requires deciding what to do with novel species and interrupted edges. Species  $t_3$  does not interrupt a factored edge, and so  $t_3$  can be reliably grouped with  $t_1$  in factor 1. However, species  $t_5$  interrupts one of the edges in the edge-path of factor 2. (D-E) Interruptions can be ignored, or they can be used to refine the location of important edges (illustrated in Factor 2.1 and Factor 2.2). Another topological and statistical question is whether/not to control for factor order. For instance, controlling for factor order with Factor 2.2 would partition  $t_4$  from  $\{t_2, t_5\}$ . Not controlling for factor order would partition  $t_4$  from  $\{t_1, t_2, t_3, t_5\}$ .

953 **Stopping Criteria** With appropriately defined aggregation and contrast func-  
 954 tions, phylofactorization can be iterated until every species is split and the graph  
 955 is fully partitioned. However, such full partitioning is rarely desired. Rather,  
 956 researchers may often want a minimal set of partitions for prioritization of find-  
 957 ings, simplicity of summarizing the data, and certainty in the inferences made.  
 958 There are two broad options for stopping phylofactorization: a stopping func-

tion demonstrated to be sufficiently conservative, and null simulations allowing quantile-based cutoffs (e.g. stop phylofactorization when the percent variance explained by PhyCA is within the 95% quantile of null phylofactorizations). Null simulations may allow statistical statements stemming from a clear null model, but stopping criteria can be far more computationally efficient and can be constructed to be conservative.

Washburne et al. [51] proposed a stopping criterion for regression-phylofactorization which extends to all methods of phylofactorization using an objective function that is a test-statistic whose null-distribution is known. The original stopping criterion is based on the fact that, if the null hypothesis is true, the distribution of P-values from multiple hypothesis tests is uniform. Phylofactorization performs multiple hypothesis tests at each iteration. At each iteration, one can perform a one-tailed KS test on the uniformity of the distribution of the P-values from the test-statistics on each edge; if the KS-test is non-significant, stop phylofactorization. KS-test stopping criteria can conservatively stop simulations at the appropriate number of factors when there is a discrete subset of edges with effects. Such a method performs similarly to Horn's stopping criterion for factor analysis [21], whereby one stops factorization when the scree plot from the data crosses that expected from null data (figure 8). It's also possible to first use a stopping criterion and subsequently run null simulations to understand the likelihood of observed results under a null model of the researcher's choice (figure 8).

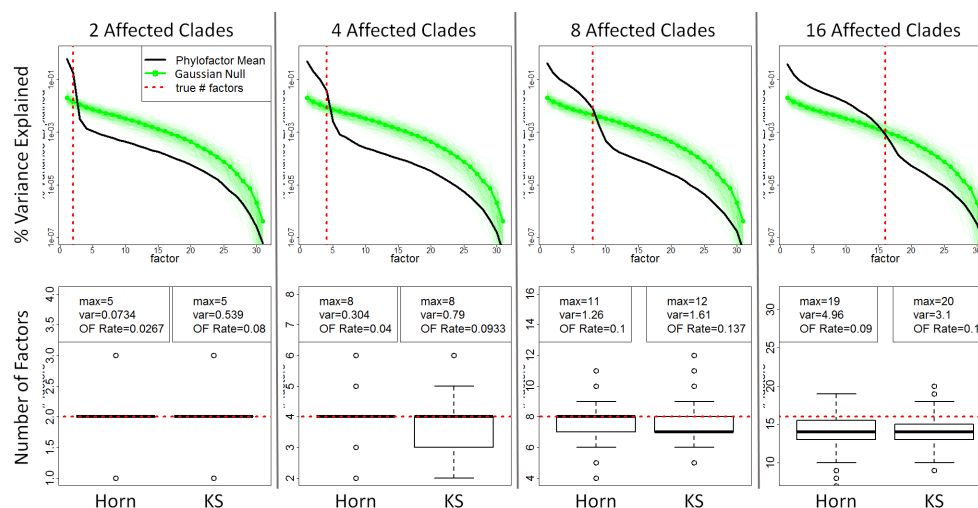

**Figure 8: Null simulations and stopping criteria.** A challenge of phylofactorization is determining the number of factors,  $K$ , to include in an analysis. Null simulations can be used to construct quantile-based cutoffs such as those in Horn’s parallel analysis from factor analysis. Stopping criteria aim to stop the computationally intensive iteration of phylofactorization without using null simulations but instead using features available during phylofactorization of the observed data. Abundances of  $m = 32$  species across  $n = 10$  samples were simulated as i.i.d. standard Gaussian random variables. To simulate effects, a set of  $u$  clades were associated with environmental meta-data,  $\mathbf{z}$ , where  $z_j \stackrel{i.i.d.}{\sim} N(0, 1)$ . Regression-phylofactorization on the contrast-basis scores  $y_e$  was performed on 300 datasets for each  $u \in \{2, 4, 8, 16\}$  and on data with and without effects, with objective function being the variance explained by regression  $y_e \sim \mathbf{z}$ . (**top row**) The percent explained variance (EV) decreases with factor,  $k$ , and the mean EV curve for data with  $u$  affected clades intersects the mean EV curve for null data near where  $k = u$ , motivating a stopping criterion (Horn) based on phylofactorization of null datasets to be evaluated and compared to the KS-based stopping criterion proposed by [51]. (**bottom row**) The Horn stopping criterion has a lower over-factorization (OF) rate than the standard KS stopping criterion (where OF rate is the fraction of the 300 phylofactorizations of data with simulated effects in which  $K > u$ ). Both criteria can be modified to be made more conservative (e.g. the P-value threshold for the KS stopping criterion can be lowered, or the Horn criterion can be modified to stop the simulation at different quantiles of null simulations). The KS stopping criterion, however, is far less computationally intensive for large datasets as it requires running phylofactorization only once. Null simulations, however, can allow inferential statistical statements regarding the null distribution of test statistics in phylofactorization.

**Calibrating Statistical Tests for  $\omega_{e^*}$**  Often, the objective function for the winning edge in phylofactorization,  $\omega_{e^*}$ , corresponds directly to a common test-statistic such as an  $F$ -statistic. Applying a standard test for the resul-

tant test-statistic, however, will lead to a high false-positive rate and an over-estimation of the significance of an effect, as the statistic was drawn as the best of many. Even when using a test-statistic not equal to the objective function, researchers should be cautious of dependence between their test-statistic and the objective function as a possible source of high false-positive rates. Two non-exhaustive avenues for calibrating, or making conservative, statistical tests of  $\omega_{e^*}$  are multiple-comparisons corrections to control a family-wise error rate (or other multiple-hypothesis-test methods) or conservative bounds on the distribution of the maximum of many independent, identically distributed statistics. For example, if each edge of  $K_t$  edges resulted in an independent  $F$ -statistic,  $F_e$ , then the distribution of the maximum  $F$ -statistics,  $F_{e^*}$ , is

$$\begin{aligned} P\{F_{e^*} > F\} &= P\{F_{e_1} > F \cap F_{e_2} > F \cap \dots \cap F_{e_K}\} \\ &= P\{F_e > F\}^{K_t}. \end{aligned} \quad (27)$$

Such an approximation may be used to yield conservative estimates, but the  $F$ -statistics are not independent and thus more nuanced analyses are needed for well-calibrated statistical tests.

**Summary of limitations** Phylofactorization can be a reliable statistical tool with a careful understanding of the statistical challenges inherent in the method and shared with related methods such as graph-partitioning, greedy algorithms, factor analysis, and the use of a constrained, biased basis for matrix factorization. Phylofactorization can first and easiest be an exploratory tool, but all exploratory tools can be made inferential with suitable understanding of their behavior under an appropriate null model. For example, principal components analysis was and still is primarily an exploratory tool, but the discovery of the Marcenko-Pastur distribution [30] has improved the calibration of statistical

993 tests on principal components for standardized, mean-centered data. Improved  
 994 understanding of how uncertainties in phylogenetic inference translate to uncer-  
 995 tainties in phylofactorization, conservative stopping criteria, null distributions  
 996 of test-statistics for winning edges, propagation of error and stochastic sampling  
 997 algorithms to avoid deterministic ruts, graph-topological biases and confidence  
 998 regions on a graph, can all improve the reliability of phylofactorization as an  
 999 inferential tool.

1000 While phylofactorization was built with an evolutionary model of punctuated  
 1001 equilibria in mind, it may also work well under other evolutionary models such  
 1002 as niches leading to correlated evolution of descendants. There may also be  
 1003 many evolutionary models under which phylofactorization does not perform  
 1004 well. For instance the graph-topological biases of PhyCA are increased under  
 1005 a Brownian motion model of evolution. All statistical tools operate well under  
 1006 appropriate assumptions, and understanding the assumptions, as well as the  
 1007 known limitations, are necessary for responsible and academically fruitful use  
 1008 of statistical tools like phylofactorization.

## 1009 Discussion

1010 Functional ecological traits underlie many observed patterns in ecology, includ-  
 1011 ing species abundances, presence/absence of species, and responses of traits  
 1012 or abundances to experimental conditions or along environmental gradients.  
 1013 Where the ecological pattern of interest is associated with heritable traits, the  
 1014 phylogeny provides a scaffold for the discovery of functional groupings of clades  
 1015 underlying the ecological pattern of interest. Traits arise along edges, and con-  
 1016 trasting taxa on opposing sides of an edge allows one to uncover edges best  
 1017 separating species with different functional associations or links to the ecologi-

cal pattern. By noting that each edge partitions the phylogeny into two disjoint sets of species, by generalizing the operations of “grouping” - aggregating and contrasting disjoint sets of species - and by defining the objective function of interest (the pattern), we have proposed a universal method for identifying relevant phylogenetic scales in arbitrary datasets.

Phylofactorization is a graph-partitioning algorithm intended to separate the phylogeny into binned phylogenetic units with a combination of high within-group similarity and high between-group differences. Two-sample tests are a natural method for making such partitions in vectors of data, although such partitions can also be made with ancestral state reconstruction. The idea behind two-sample tests, however, can be extended to larger, real-valued datasets by analysis of a contrast basis. Objective functions for choosing the appropriate contrast basis include maximizing variance - a phylogenetic analog of principal components analysis - maximizing explained variance from regression, maximizing F-statistics from regression, and more. We’ve illustrated that two-sample tests can partition a dataset of mammalian body mass into groups with very different average body masses. We’ve demonstrated that maximizing variance of data projected onto a contrast basis can identify major clades of bacteria in human feces that have been known, at a coarser resolution, to be highly variable and determined that one of the top phylogenetic factors in the American Gut dataset is a clade of Gammaproteobacteria associated with IBD and used recently in an effort to diagnose patients with Crohn’s disease. We’ve shown that such analysis of contrast bases can couple with non-linear regression, and within minutes of analysis on a laptop found a natural way put over 3,000 species into 5 binned phylogenetic units, sort them along an axis of the dominant explanatory variable, and produce a simplified story of the dominant phylogenetic scales of explained variation in Central Park soil. One can also perform phylofactoriza-

tion when doing maximum-likelihood regression of exponential family random variables. Factor contrasts are a natural, built-in method for extending the concepts of aggregation and contrast to generalized linear models and generalized additive models. One can either perform the factor contrasts on the raw data, or, for many exponential family random variables, one can aggregate the data from each group to a marginally stable distribution for more computationally efficient and powerful factor contrasts. These methods can be implemented in the R package “phylofactor”, and scripts for running each analysis are available in the supplemental materials.

As with any method, there are limitations to be aware of. First, the general problem of separating species into  $k$  bins that maximize some global objective function of high within-group similarity and high between-group differences is NP hard. Second, like any greedy algorithm, purely deterministic phylofactorization may fall into ruts and errors in one step might propagate into downstream inferences. Third, the null distribution of test-statistics resulting from phylofactorization is not known and is biased towards extreme values due to the algorithm choosing species which maximize objective functions. We propose null simulations, conservative stopping functions, and/or extremely stringent multiple comparisons corrections for users attempting to make inferences through phylofactorization while maintaining a certain family-wise error or false-discovery rate. When the objective function being maximized is also a test-statistic with a well-defined null distribution, one-sided KS-tests of the P-values from the test-statistic can serve as a computationally efficient and conservative stopping function. Fourth, the contrast basis is biased towards the tips due, we hypothesize, to the unequal relative sizes of the Voronoi cells of the contrast basis elements in the unit hypersphere in which they lie. Such topological bias is exacerbated by data produced through Brownian motion dif-

1072 fusion along the phylogeny, and reversed for Fisher’s exact test of a vector of  
 1073 binary trait data. Understanding the graph-topology of errors can assist the  
 1074 description of graph-topological confidence regions for each inference. Finally,  
 1075 phylofactorization formalizes the logic of cross-validating ecological comparisons  
 1076 even when the training and testing sets of species are completely disjoint, but  
 1077 such cross-validation must address the issues of interrupting edges and whether  
 1078 or not to control for factor order in cross-validation. Many of these limita-  
 1079 tions may be resolved with future work, allowing the general algorithm and its  
 1080 common implementations to become a reliable, well-calibrated inferential tool.

1081     Phylofactorization is its ability to objectively identify phylogenetic scales for  
 1082 ecological big-data and instantly produce avenues for future research to elucidate  
 1083 mechanisms that underlie patterns in big-data. By iteratively identifying clades,  
 1084 phylofactorization provides a sequence of low-rank approximations of a dataset,  
 1085 such as that visualized in figure 3c, which correspond to groups of species with  
 1086 a shared evolutionary history. What traits characterize the Chloracidobacteria  
 1087 which don’t like acidic soils? What traits characterize the monophyletic clade  
 1088 of Gammaproteobacteria that are associated with IBD? What traits underlie  
 1089 the Clostridia/Erysipelotrichi being such variable species in the American gut?  
 1090 Phylofactorization has identified clades from big-data, and produced questions  
 1091 that can be subsequently answered by comparative genomics, microbial physio-  
 1092 logical studies, and other clear avenues of future research.

1093 **Relation to other phylogenetic methods** Phylofactorization is proposed  
 1094 amidst an explosion of literature in phylogenetic comparative methods and vari-  
 1095 ous other phylogenetic methods for analyzing ecological datasets [29, 38, 14], and  
 1096 some careful thinking is beneficial to clarify the distinctions between the myriad  
 1097 methods. First, phylogenetically independent contrasts [13] produces variables  
 1098 corresponding to contrasts of descendants from each node, whereas phylofactor-



1099 ization uses contrasts of species separated by an edge, picks out the best edge,  
1100 splits the tree, and repeats. Phylogenetic generalized least squares [16] aims to  
1101 control for residual structure in the response variable expected under a model of  
1102 trait evolution, and is thus used when performing regression on a trait, whereas  
1103 phylofactorization aims to partition observed trait values or abundances into  
1104 groups with different means or associations with meta-data along edges along  
1105 which differences most likely arose. Thus, while methods of phylogenetic sig-  
1106 nal, such as Pagel's  $\lambda$  [35] or Blomberg's  $\kappa$  [5], summarize global patterns of  
1107 phylogenetic signal by parameterizing the extent to which a particular model of  
1108 evolution can be assumed to underlie the residual structure of observed traits  
1109 (often for downstream use in PGLS), phylofactorization iteratively identifies  
1110 precise locations of putative changes and precise locations partitioning phyloge-  
1111 netic signal or structure. Phylofactorization can be implemented by a contrast  
1112 of ancestral state reconstructions of nodes separated by edges, for example by  
1113 looking for edges with nodes whose reconstructed ancestral states are most dif-  
1114 ferent, but is limited by disallowing the descendant clade of an edge to impact  
1115 the ancestral state of the edge's basal node - a proper non-overlapping contrast  
1116 would separate the groups of species being used to reconstruct each node, and  
1117 thus phylofactorization can be implemented with ancestral state reconstruction  
1118 under the assumption of time-reversible evolutionary models. Phylofactoriza-  
1119 tion develops a set of variables and an orthonormal basis to describe ecological  
1120 data, but limits itself to bases interpretable as non-overlapping contrasts along  
1121 edges; eigenvectors of phylogenetic distances matrices or covariance matrices  
1122 under diffusion models of traits [35], are not encompassed in phylofactorization  
1123 as they do not construct non-overlapping contrasts along edges. Such eigenvec-  
1124 tor methods construct quantities whose evolutionary interpretation is less clear.  
1125 Unlike many modern methods for re-defining distances, such as UniFrac dis-

1126 tances [29] or phylogenetically-defined inner products [38], phylofactorization is  
1127 principally about discovering phylogenetically-interpretable directions - vectors  
1128 which characterize primary axes of variation in the community and represented  
1129 through the contrast basis, a multilevel-factor developed from stepwise selection  
1130 of factor contrasts, or a basis made of aggregations of the binned phylogenetic  
1131 units.

1132 **Phylofactorization as a species concept** There is great debate about what  
1133 constitutes a species in microbes, let alone all organisms. There is a need for  
1134 objectivity and universality in the definition of “species” and other units in  
1135 ecology and evolution. The biological species concept is complicated by asexual  
1136 reproduction. Genetic species concepts are limited by the subjectivity of a  
1137 sequence-similarity cutoff, such as the 97% sequence similarity commonly used  
1138 in defining operational taxonomic units or OTUs, which is additionally complicated  
1139 by the fact that functional ecological similarity may not be uniform at  
1140 a given sequence-similarity cutoff. Ecological species concepts are often useful  
1141 once researchers have a clear sense of the functional ecological groups, but it is  
1142 difficult to objectively define what constitutes an important functional ecological  
1143 group, especially for taxa whose life histories are unknown. Species concepts  
1144 coarse-grain the diversity of life in a way that connects our coarse-grained units  
1145 to biological, ecological, and evolutionary theory. To that end, phylofactorization  
1146 can be seen as defining a species concept.

1147 Species concepts are fundamental to biology as they partition the diversity of  
1148 life into units between which we define ecological interactions and within which  
1149 we define evolution and natural selection. At the heart of species concepts are  
1150 the operations fundamental to phylofactorization: aggregation, contrast, and an  
1151 objective function. Species are aggregations of finer units of diversity: individual  
1152 subpopulations of individual organisms and their individual cells and the cells’

individual genes are all aggregated to define a “population”. Aggregation in a species concept defines a clear partition for later “within-species” contrasts (evolution) and “between-species” interactions (competition & ecological interactions among populations or aggregates of species). A species concept must meaningfully contrast the units of diversity - the biological species concept contrasts species based on reproductive isolation, the genetic species concept contrasts species based on genetic dissimilarity, and ecological species concepts contrast species based on distinct functional ecological traits. The objective function in phylofactorization is the theoretical placeholder for a researcher’s “meaningful contrast”. The units for aggregation and contrast must be done in light of some objective, such as a common fitness or pattern of relative abundance within units over time, space, across environmental gradients and/or between experimental treatments. A full theoretical consideration of phylofactorization as a species concept, as it relates to evolutionary and ecological theory, is saved for future research. For the time being, we note that phylofactorization partitions diversity and yields notions of a “species” which can be aggregated and contrasted with other “species”.

Phylofactorization is a flexible species concept, a hybrid of the phylogeny-based phylogenetic species concept [34] and the character-based ecological species concept [48]. After  $k$  iterations of phylofactorization, the phylogeny is partitioned into  $k + 1$  bins of species referred to as “binned phylogenetic units” (BPUs). BPUs are aggregations of the phylogeny which, up to a certain level of partitioning, are more similar to one-another with respect to the aggregation, contrast and objective function, than they are to other groups. BPUs are a coarse-grained way to cluster entities into “units” of organization with common behavior with respect to the ecological pattern defined in the objective function. Phylofactorization defines functional groups based on phylogenetic

partitions and a similar association with some ecological pattern of interest. Consequently, phylofactorization can be seen as an ecological species concept constrained to a phylogenetic scaffold. Whereas the phylogenetic species concept is character-based and pattern oriented, phylofactorization is pattern-based and phylogenetically-constrained. A textbook example of a phylofactorization-derived species are “land-dwelling tetrapods”, a group which can be obtained objectively through phylofactorization and which defines a scale for aggregating and summarizing the pattern of vertebrate species-abundances on Earth.

Phylofactorization permits optional fine-graining and coarse-graining of our patterns of diversity. Phylofactorization provides an algorithm for identifying relevant units, and those units may be at different taxonomic or phylogenetic depths but will have shared evolutionary history and similar associations with the ecological pattern of interest. For microorganisms, for which the biological species concept doesn’t apply, the genetic species concept appears too detached from ecology, and the ecological species concept is unavailable due to lack of life history detail, phylofactorization serves as a way to organize diversity for focused between-species interactions and within-species comparisons.

**R package: phylofactor** An R package is in development and, prior to its stable release to CRAN, publicly available at <https://github.com/reptalex/phylofactor>. The R package contains detailed help functions and supports flexible definition of two-sample tests (the function `twoSampleFactor`), contrast-basis analyses with the function `PhyloFactor`, and generalized phylofactorization of exponential family random variables with the function `gpf`. Phylofactorization is highly parallelizable, and the R package functions have built-in parallelization. The R package in development also works with phylogenies containing polytomies, allowing researchers to collapse clades with low bootstrap support to make more robust inferences. The output from each of the three phylofactorization functions is

1207 a “phylofactor” object one can input into various functions which summarize,  
1208 plot, cross-validate, run null simulations, and parse out the information from  
1209 phylofactorization. Future releases aim to simplify this into a single function:  
1210 phylofactor. Researchers are invited to contact the corresponding author for  
1211 assistance with the package and how to produce their own customized phylo-  
1212 factorizations - such feedback will be essential for a user-friendly stable release  
1213 to CRAN.

1214 Until then, the supplemental information contains the data and scripts used  
1215 for all analyses done in this manuscript in an effort to accelerate method devel-  
1216 opment in this field.

1217 **“Everything makes sense in light of evolution”** Phylogenetic factoriza-  
1218 tion is a new paradigm for analyzing a large class of biological data. Ecological  
1219 big-data, as Thomas Dhobzansky noted about biology in general, makes sense  
1220 “in light of evolution”. Phylofactorization extends a broad category of data anal-  
1221 yses - two sample tests, generalized linear modelling, factor analysis and PCA,  
1222 and analysis of spatial and temporal patterns - to incorporate a natural set of  
1223 variables and operations defined by the phylogeny. Phylofactorization localizes  
1224 inferences in big data to particular edges or chains of edges on the phylogeny  
1225 and, in so doing, can accelerate our understanding of the phylogenetic scales  
1226 underlying ecological patterns of interest. The problem of pattern and scale is  
1227 central to biology, and phylofactorization uses the pattern to objectively uncover  
1228 the relevant phylogenetic scales in ecological datasets.

## 1229 Acknowledgments

1230 This work is published in loving memory of Diana Nemergut. This research was  
1231 developed with funding from the Defense Advanced Research Projects Agency  
1232 (DARPA; D16AP00113).

# 1233 Table of mathematical notation

| Term                  | Description                                                                  | Terms                  | Description                                                                                            |
|-----------------------|------------------------------------------------------------------------------|------------------------|--------------------------------------------------------------------------------------------------------|
| $A(\cdot)$            | Aggregation operator                                                         | $r, s$                 | Numbers of species in groups $R, S$ respectively                                                       |
| $C(\cdot, \cdot)$     | Contrast operator                                                            | $s(\cdot)$             | Smoothing spline notation for term in generalized additive model                                       |
| $\mathcal{F}(\theta)$ | Distribution parameterized by $\theta$                                       | $t$                    | Iteration of phylofactorization                                                                        |
| $F_e$                 | F-statistic for edge $e$                                                     | $x_{i,j}$              | The $i, j$ th element of data matrix $\mathbf{X}$                                                      |
| $K_t$                 | Number of edges considered in iteration $t$ of phylofactorization            | $x_{R,j}$              | Aggregate, $A(\mathbf{x}_j)$ of group $R$ for sample $j$ . If $j$ is missing then sample is arbitrary. |
| $N$                   | Size of a binomial random variable                                           | $x_{S,j}$              | See $x_{R,j}$ above.                                                                                   |
| $Q$                   | A group $Q = R \cup S$ aggregated at a current or previous iteration         | $x_i$                  | A random variable (assumed to be a single species $i$ for arbitrary sample)                            |
| $R, S$                | Two groups contrasted containing $r$ and $s$ species, respectively           | $[x]_{i,j}$            | $i, j$ th entry of data matrix, $\mathbf{X}$                                                           |
| U, B, P               | Meta-data subsets for phylofactorization                                     | $z_i$                  | Column of meta-data matrix, $\mathbf{Z}$                                                               |
| $\mathcal{T}$         | Phylogenetic tree                                                            | $\mathbf{v}_{Q,i}$     | $i$ th element of aggregation basis for set $Q$                                                        |
| $\mathbf{V}$          | $m \times K_t$ matrix of contrast basis elements considered at iteration $t$ | $\mathbf{v}_{C_{R S}}$ | Contrast vector splitting groups $R$ and $S$                                                           |
| $\mathbf{X}$          | $m \times n$ data matrix used for phylofactorization                         | $\mathbf{v}_{C_e}$     | Contrast vector for edge $e$ (which splits sub-tree into two disjoint groups)                          |
| $\mathbf{Y}$          | $K \times n$ matrix of component scores, one for each edge considered        | $\mathbf{w}_{R,j}$     | $r$ -vector containing only the species in group $R$ for sample $j$                                    |
| $\mathbf{Z}$          | $n \times p$ matrix of meta-data used in regression-phylofactorization       | $\mathbf{w}_{S,j}$     | See $\mathbf{w}_{R,j}$ above.                                                                          |
| $a$                   | Coefficient in aggregation vector                                            | $\mathbf{w}$           | $m$ -vector of species' data for an arbitrary sample                                                   |
| $b, c$                | Coefficients in a contrast vector                                            | $\bar{\mathbf{w}}$     | Sample mean of vector $\mathbf{w}$                                                                     |
| $e_k$                 | Edge $k$                                                                     | $\mathbf{y}_e$         | $n$ -vector of component scores for edge $e$                                                           |
| $e^*$                 | Winning edge                                                                 | $\mathbf{z}_k$         | Vector of meta-data of type $k$ .                                                                      |
| $e_t^*$               | Winning edge at iteration $t$                                                | $\beta_i$              | Coefficients for linear model                                                                          |
| $f(\cdot)$            | Transformation in generalized $f$ -mean                                      | $\eta$                 | Natural parameter for exponential-family random variable                                               |
| $g$                   | Factor containing two levels, $\{R, S\}$                                     | $\kappa$               | Scale parameter for Gamma distribution                                                                 |
| $i, j, k, l$          | Indexes. Often, $i$ is the index for species and $j$ for samples.            | $\pi$                  | Number of failures parameter for Negative Binomial distribution.                                       |
| $m$                   | Number of species                                                            | $\rho$                 | Probability of success for Bernoulli, Binomial, Negative Binomial distributions                        |
| $n$                   | Number of samples                                                            | $\sigma$               | Standard deviation for Gaussian random variable                                                        |
| $p$                   | Number of meta-data types for each sample                                    | $\theta$               | Arbitrary parameters for probability distribution                                                      |
| $q$                   | Number of pure aggregates in a basis for $\mathbb{R}^m$                      |                        |                                                                                                        |

# References

- [1] J. AITCHISON, *The statistical analysis of compositional data*, (1986).
- [2] J. ALROY, *Cope's rule and the dynamics of body mass evolution in north american fossil mammals*, Science, 280 (1998), pp. 731–734.
- [3] ———, *The fossil record of north american mammals: evidence for a paleocene evolutionary radiation*, Systematic Biology, 48 (1999), pp. 107–118.
- [4] J. BAKER, A. MEADE, M. PAGEL, AND C. VENDITTI, *Adaptive evolution toward larger size in mammals*, Proceedings of the National Academy of Sciences, 112 (2015), pp. 5093–5098.
- [5] S. P. BLOMBERG, T. GARLAND JR, A. R. IVES, AND B. CRESPI, *Testing for phylogenetic signal in comparative data: behavioral traits are more labile*, Evolution, 57 (2003), pp. 717–745.
- [6] A. BULUÇ, H. MEYERHENKE, I. SAFRO, P. SANDERS, AND C. SCHULZ, *Recent advances in graph partitioning*, in Algorithm Engineering, Springer, 2016, pp. 117–158.
- [7] J. C. CLEMENTE, L. K. URSELL, L. W. PARFREY, AND R. KNIGHT, *The impact of the gut microbiota on human health: an integrative view*, Cell, 148 (2012), pp. 1258–1270.
- [8] T. Z. DESANTIS, P. HUGENHOLTZ, N. LARSEN, M. ROJAS, E. L. BRODIE, K. KELLER, T. HUBER, D. DALEVI, P. HU, AND G. L. ANDERSEN, *Greengenes, a chimera-checked 16s rrna gene database and workbench compatible with arb*, Applied and environmental microbiology, 72 (2006), pp. 5069–5072.



- 1257 [9] J. J. EGOZCUE AND V. PAWLOWSKY-GLAHN, *Groups of parts and their*  
1258 *balances in compositional data analysis*, Mathematical Geology, 37 (2005),  
1259 pp. 795–828.
- 1260 [10] J. J. EGOZCUE, V. PAWLOWSKY-GLAHN, G. MATEU-FIGUERAS, AND  
1261 C. BARCELO-VIDAL, *Isometric logratio transformations for compositional*  
1262 *data analysis*, Mathematical Geology, 35 (2003), pp. 279–300.
- 1263 [11] C. E. FARRIOR, R. DYBZINSKI, S. A. LEVIN, AND S. W. PACALA, *Com-*  
1264 *petition for water and light in closed-canopy forests: a tractable model of*  
1265 *carbon allocation with implications for carbon sinks*, The American Natu-  
1266 *ralist*, 181 (2013), pp. 314–330.
- 1267 [12] J. FELSENSTEIN, *Confidence limits on phylogenies: an approach using the*  
1268 *bootstrap*, Evolution, (1985), pp. 783–791.
- 1269 [13] ———, *Phylogenies and the comparative method*, The American Naturalist,  
1270 125 (1985), pp. 1–15.
- 1271 [14] L. Z. GARAMSZEI, *Modern phylogenetic comparative methods and their*  
1272 *application in evolutionary biology*, Concepts and Practice. London, UK:  
1273 Springer, (2014).
- 1274 [15] N. E.-S. J. GOULD, *Punctuated equilibria: an alternative to phyletic grad-*  
1275 *ualism*, (1972).
- 1276 [16] A. GRAFEN, *The phylogenetic regression*, Philosophical Transactions of the  
1277 Royal Society of London. Series B, Biological Sciences, 326 (1989), pp. 119–  
1278 157.
- 1279 [17] C. H. GRAHAM, D. STORCH, AND A. MACHAC, *Phylogenetic scale in*  
1280 *ecology and evolution*, bioRxiv, (2017).

- 1281 [18] B. G. HALL AND M. BARLOW, *Evolution of the serine  $\beta$ -lactamases: past,*  
1282 *present and future*, Drug Resistance Updates, 7 (2004), pp. 111–123.
- 1283 [19] T. F. HANSEN, *Stabilizing selection and the comparative analysis of adap-*  
1284 *tation*, Evolution, 51 (1997), pp. 1341–1351.
- 1285 [20] W. K. HASTINGS, *Monte carlo sampling methods using markov chains and*  
1286 *their applications*, Biometrika, 57 (1970), pp. 97–109.
- 1287 [21] J. L. HORN, *A rationale and test for the number of factors in factor anal-*  
1288 *ysis*, Psychometrika, 30 (1965), pp. 179–185.
- 1289 [22] S. P. HUBBELL, *The Unified Neutral Theory of Biodiversity and Bio-*  
1290 *geography (MPB-32)*, Princeton University Press, 2001.
- 1291 [23] M. JERRUM AND G. B. SORKIN, *The metropolis algorithm for graph bi-*  
1292 *section*, Discrete Applied Mathematics, 82 (1998), pp. 155–175.
- 1293 [24] K. E. JONES, J. BIELBY, M. CARDILLO, S. A. FRITZ, J. O'DELL,  
1294 C. D. L. ORME, K. SAFI, W. SECHREST, E. H. BOAKES, C. CAR-  
1295 BONE, ET AL., *Pantheria: a species-level database of life history, ecology,*  
1296 *and geography of extant and recently extinct mammals*, Ecology, 90 (2009),  
1297 pp. 2648–2648.
- 1298 [25] Y. KATZ, K. TUNSTRØM, C. C. IOANNOU, C. HUEPE, AND I. D. COUZIN,  
1299 *Inferring the structure and dynamics of interactions in schooling fish*, Pro-  
1300 ceedings of the National Academy of Sciences, 108 (2011), pp. 18720–18725.
- 1301 [26] M. J. LANDIS, J. G. SCHRAIBER, AND M. LIANG, *Phylogenetic analysis*  
1302 *using lévy processes: finding jumps in the evolution of continuous traits*,  
1303 Systematic biology, 62 (2012), pp. 193–204.
- 1304 [27] S. A. LEVIN, *The problem of pattern and scale in ecology: the robert h.*  
1305 *macarthur award lecture*, Ecology, 73 (1992), pp. 1943–1967.

- 1306 [28] R. E. LEY, P. J. TURNBAUGH, S. KLEIN, AND J. I. GORDON, *Microbial*  
1307 *ecology: human gut microbes associated with obesity*, Nature, 444 (2006),  
1308 pp. 1022–1023.
- 1309 [29] C. LOZUPONE AND R. KNIGHT, *Unifrac: a new phylogenetic method for*  
1310 *comparing microbial communities*, Applied and environmental microbiol-  
1311 ogy, 71 (2005), pp. 8228–8235.
- 1312 [30] V. A. MARČENKO AND L. A. PASTUR, *Distribution of eigenvalues for*  
1313 *some sets of random matrices*, Mathematics of the USSR-Sbornik, 1 (1967),  
1314 p. 457.
- 1315 [31] D. MARIAT, O. FIRMESSE, F. LEVENEZ, V. GUIMARÃES, H. SOKOL,  
1316 J. DORÉ, G. CORTHIER, AND J. FURET, *The firmicutes/bacteroidetes ra-*  
1317 *tio of the human microbiota changes with age*, BMC microbiology, 9 (2009),  
1318 p. 123.
- 1319 [32] N. METROPOLIS, A. W. ROSENBLUTH, M. N. ROSENBLUTH, A. H.  
1320 TELLER, AND E. TELLER, *Equation of state calculations by fast computing*  
1321 *machines*, The journal of chemical physics, 21 (1953), pp. 1087–1092.
- 1322 [33] F. MICHONNEAU, J. W. BROWN, AND D. J. WINTER, *rotl: an r package to*  
1323 *interact with the open tree of life data*, Methods in Ecology and Evolution,  
1324 7 (2016), pp. 1476–1481.
- 1325 [34] K. C. NIXON AND Q. D. WHEELER, *An amplification of the phylogenetic*  
1326 *species concept*, Cladistics, 6 (1990), pp. 211–223.
- 1327 [35] M. PAGEL, *Inferring the historical patterns of biological evolution*, Nature,  
1328 401 (1999), pp. 877–884.
- 1329 [36] E. PARADIS, J. CLAUDE, AND K. STRIMMER, *Ape: analyses of phyloge-*  
1330 *netics and evolution in r language*, Bioinformatics, 20 (2004), pp. 289–290.

- 1331 [37] R. K. PLOWRIGHT, C. R. PARRISH, H. MCCALLUM, P. J. HUDSON,  
1332 A. I. KO, A. L. GRAHAM, AND J. O. LLOYD-SMITH, *Pathways to zoonotic*  
1333 *spillover*, Nature Reviews Microbiology, (2017).
- 1334 [38] E. PURDOM, *Analysis of a data matrix and a graph: Metagenomic data and*  
1335 *the phylogenetic tree*, The Annals of Applied Statistics, (2011), pp. 2326–  
1336 2358.
- 1337 [39] K. S. RAMIREZ, J. W. LEFF, A. BARBERÁN, S. T. BATES, J. BET-  
1338 LEY, T. W. CROWTHER, E. F. KELLY, E. E. OLDFIELD, E. A. SHAW,  
1339 C. STEENBOCK, ET AL., *Biogeographic patterns in below-ground diversity*  
1340 *in new york city’s central park are similar to those observed globally*, in  
1341 Proc. R. Soc. B, vol. 281, The Royal Society, 2014, p. 20141988.
- 1342 [40] L. J. REVELL, *phytools: an r package for phylogenetic comparative biology*  
1343 *(and other things)*, Methods in Ecology and Evolution, 3 (2012), pp. 217–  
1344 223.
- 1345 [41] K.-I. SATO, *Lévy processes and infinitely divisible distributions*, Cambridge  
1346 university press, 1999.
- 1347 [42] J. U. SCHER, A. SZESNAK, R. S. LONGMAN, N. SEGATA, C. UBEDA,  
1348 C. BIELSKI, T. ROSTRON, V. CERUNDOLO, E. G. PAMER, S. B. ABRAM-  
1349 SON, ET AL., *Expansion of intestinal prevotella copri correlates with en-*  
1350 *hanced susceptibility to arthritis*, Elife, 2 (2013), p. e01202.
- 1351 [43] K. P. SCHLIEP, *phangorn: phylogenetic analysis in r*, Bioinformatics, 27  
1352 (2011), pp. 592–593.
- 1353 [44] J. D. SILVERMAN, A. D. WASHBURNE, S. MUKHERJEE, AND L. A.  
1354 DAVID, *A phylogenetic transform enhances analysis of compositional mi-*  
1355 *crobiota data*, Elife, 6 (2017), p. e21887.

- 1356 [45] F. A. SMITH, A. G. BOYER, J. H. BROWN, D. P. COSTA, T. DAYAN,  
1357 S. M. ERNEST, A. R. EVANS, M. FORTELIUS, J. L. GITTLEMAN, M. J.  
1358 HAMILTON, ET AL., *The evolution of maximum body size of terrestrial*  
1359 *mammals*, science, 330 (2010), pp. 1216–1219.
- 1360 [46] F. A. SMITH AND S. K. LYONS, *How big should a mammal be? a macroe-*  
1361 *cological look at mammalian body size over space and time*, Philosophical  
1362 Transactions of the Royal Society of London B: Biological Sciences, 366  
1363 (2011), pp. 2364–2378.
- 1364 [47] P. J. TURNBAUGH, R. E. LEY, M. A. MAHOWALD, V. MAGRINI, E. R.  
1365 MARDIS, AND J. I. GORDON, *An obesity-associated gut microbiome with*  
1366 *increased capacity for energy harvest*, nature, 444 (2006), pp. 1027–131.
- 1367 [48] L. VAN VALEN, *Ecological species, multispecies, and oaks*, Taxon, (1976),  
1368 pp. 233–239.
- 1369 [49] Y. VÁZQUEZ-BAEZA, A. GONZALEZ, Z. Z. XU, A. WASHBURNE, H. H.  
1370 HERFARTH, R. B. SARTOR, AND R. KNIGHT, *Guiding longitudinal sam-*  
1371 *pling in ibd cohorts*, Gut, (2017), pp. gutjnl–2017.
- 1372 [50] A. D. WASHBURNE, J. W. BURBY, AND D. LACKER, *Novel covariance-*  
1373 *based neutrality test of time-series data reveals asymmetries in ecological*  
1374 *and economic systems*, PLoS computational biology, 12 (2016), p. e1005124.
- 1375 [51] A. D. WASHBURNE, J. D. SILVERMAN, J. W. LEFF, D. J. BENNETT,  
1376 J. L. DARCY, S. MUKHERJEE, N. FIERER, AND L. A. DAVID, *Phyloge-*  
1377 *netic factorization of compositional data yields lineage-level associations in*  
1378 *microbiome datasets*, PeerJ, 5 (2017), p. e2969.
- 1379 [52] G. YU, D. K. SMITH, H. ZHU, Y. GUAN, AND T. T.-Y. LAM, *ggtree: an*  
1380 *r package for visualization and annotation of phylogenetic trees with their*

- 1381 *covariates and other associated data*, Methods in Ecology and Evolution, 8  
1382 (2017), pp. 28–36.
- 1383 [53] X. ZHOU, S. XU, J. XU, B. CHEN, K. ZHOU, AND G. YANG, *Phy-*  
1384 *logenomic analysis resolves the interordinal relationships and rapid diver-*  
1385 *sification of the laurasiatherian mammals*, Systematic biology, 61 (2011),  
1386 pp. 150–164.
